# Supplementary material
Source: Royal Society of Chemistry journal article supplement (doi:10.1039/d6cp01111j)
Supplement: d6cp01111j1.pdf [file d6cp01111j1.pdf]

# CO<sub>2</sub>-Induced Anion Exchange and Diffusion Behavior in Imidazolium-Based Ionic Liquids Studied by Multinuclear DOSY NMR

Rafael D. Zink,<sup>a</sup> Jean C. B. Vieira,<sup>a</sup> Lucas L. Baldassari,<sup>a</sup> and Francisco P. dos Santos<sup>a\*</sup>

<sup>a</sup> Instituto de Química, Universidade Federal do Rio Grande do Sul, UFRGS, Av. Bento Gonçalves 9500, 91501-970, Porto Alegre, RS, Brazil.

\*[fpsantos@ufrgs.br](mailto:fpsantos@ufrgs.br)

## SUPPORTING INFORMATION FILE

### TABLE OF CONTENTS

|                                                                          |    |
|--------------------------------------------------------------------------|----|
| <b>1. General Procedure for the Synthesis of the Ionic Liquids</b> ..... | 2  |
| <b>2. NMR Spectra of Ionic Liquids</b> .....                             | 4  |
| <b>3. NMR Experiments</b> .....                                          | 7  |
| <b>3.1 Sample preparation</b> .....                                      | 7  |
| <b>3.2 <sup>1</sup>H NMR</b> .....                                       | 7  |
| <b>3.3 <sup>13</sup>C NMR</b> .....                                      | 11 |
| <b>3.4 DOSY experiments</b> .....                                        | 20 |

## 1. General Procedure for the Synthesis of the Ionic Liquids

### 1.1 Synthesis of 3-n-butyl-1,2-dimethyl-1*H*-imidazol-3-ium chloride ([BMMIm][Cl])

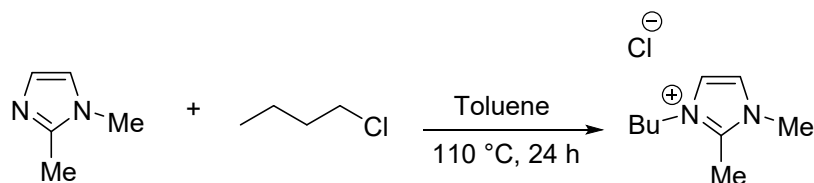

The ionic liquid was prepared according to the literature [1]. Into a three neck round bottom flask of 50 mL, equipped with a reflux condenser, were added toluene (50 mL), 1,2-dimethylimidazole (10 mL, 0.125 mol, 1 equiv.) and 1-chlorobutane (14.3 mL, 0.137 mol, 1.1 equiv.). The mixture was heated under an inert atmosphere of N<sub>2</sub> at gentle reflux for 24 h (110 °C). The mixture separated into two layers when cooled to room temperature, the top layer being toluene and the bottom layer an oil ([BMMIm][Cl]). The flask was then placed in a freezer at -18 °C overnight, whence a white solid formed. The toluene was decanted under a stream of N<sub>2</sub>. The obtained salt was purified through recrystallization with a MeCN/MeOH solvent mixture.

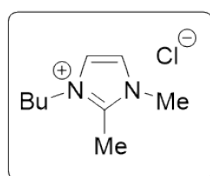

White solid. **Yield:** 23.3 g, 90%. <sup>1</sup>H NMR (400 MHz, DMSO-*d*<sub>6</sub>) δ (ppm) 7.79 – 7.74 (m, 2H); 4.14 (t, *J* = 7.3 Hz, 2H); 3.78 (s, 3H); 2.61 (s, 3H); 1.68 (quint, *J* = 7.4 Hz, 2H), 1.27 (sext, *J* = 7.7 Hz, 2H), 0.88 (t, *J* = 7.4 Hz, 3H). <sup>13</sup>C NMR (101.6 MHz, DMSO-*d*<sub>6</sub>) δ (ppm) 144.2; 122.3; 120.9; 47.2; 34.7; 31.2; 18.8; 13.4; 9.3.

### 1.2 Synthesis of 1-butyl-2,3-dimethylimidazolium imidazolate and 1-butyl-2,3-dimethylimidazolium 2methyl-imidazolate

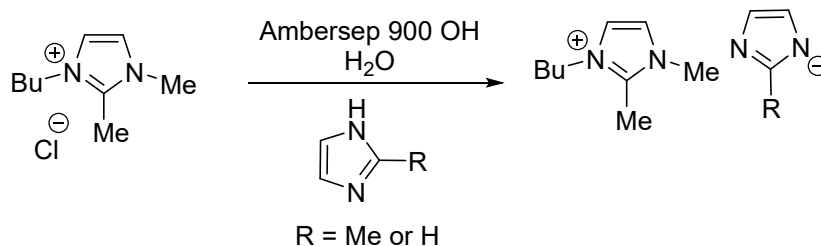

The ion exchange was carried out according to the literature [2]. The [BMMIm][Cl] salt (20 mmol, 3.77 g) was dissolved in a minimum amount of water and eluted through an ion exchange resin column (Ambersep900 OH). An aliquot of the solution was used to monitor the chloride exchange using AgNO<sub>3</sub> 1.0 M and no AgCl precipitation was observed. Imidazole (1.36 g, 20 mmol), or 2-methyl imidazole (1.64 g, 20 mmol), was added to the resulting aqueous imidazolium hydroxide solution and water was evaporated under reduced pressure and mild heating (45 °C) to afford the corresponding ionic liquid.

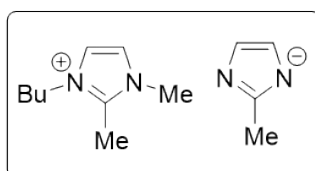

Purple solid. **Yield:** 4.45 g, 95%. <sup>1</sup>H NMR (400 MHz, DMSO-*d*<sub>6</sub>) δ (ppm) 7.67 (d, *J* = 2.0 Hz, 1H); 7.64 (d, *J* = 2.0 Hz, 1H); 6.59 (s, 2H); 4.10 (t, *J* = 7.2 Hz, 2H); 3.73 (s, 3H); 2.57 (s, 3H); 2.16 (s, 3H);

1.67 (sext,  $J = 7.2$  Hz, 2H); 1.27 (sext,  $J = 7.2$  Hz, 2H); 0.90 (t,  $J = 7.2$  Hz, 3H).  $^{13}\text{C}$  NMR (101 MHz, DMSO- $d_6$ )  $\delta$  (ppm) 146.8; 144.2; 122.8; 122.3; 120.9; 47.2; 34.6; 31.2; 18.9; 16.0; 13.4; 9.1.

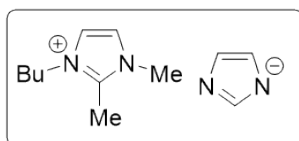

Yellow solid. **Yield:** 4.05 g, 92%.  $^1\text{H}$  NMR (400 MHz, DMSO- $d_6$ )  $\delta$  (ppm) 7.64 (d,  $J = 2.0$  Hz, 1H) 7.60 (d,  $J = 2.0$  Hz, 1H); 7.11 (s, 1H); 6.67 (s, 2H); 4.08 (t,  $J = 7.2$  Hz, 2H); 3.71 (s, 3H); 2.54 (s, 3H); 1.67 (quint,  $J = 7.6$  Hz, 2H); 1.27 (sext,  $J = 7.6$  Hz, 2H); 0.90 (t,  $J = 7.2$  Hz, 3H).  $^{13}\text{C}$  NMR (101.6 MHz, DMSO- $d_6$ )  $\delta$  (ppm) 144.2; 141.5; 124.2; 122.3; 120.9; 47.3; 34.6; 31.2; 18.9; 13.4; 9.1.

---

[1] V. Farmer, T. Welton, The oxidation of alcohols in substituted imidazolium ionic liquids using ruthenium catalysts, *Green Chem.* 4, (2002) 97–102, <https://doi.org/10.1039/B109851A>.

[2] M. Zanatta, A. Girard, G. Marin, G. Ebeling, F. P. dos Santos, C. Valsecchi, H. Stassen, P. R. Livotto, W. Lewis, J. Dupont, Confined water in imidazolium based ionic liquids: a supramolecular guest@host complex case, *Phys. Chem. Chem. Phys.* 18 (2016), 18297–18304, <https://doi.org/10.1039/C6CP03112A>.

## 2. NMR Spectra of Ionic Liquids

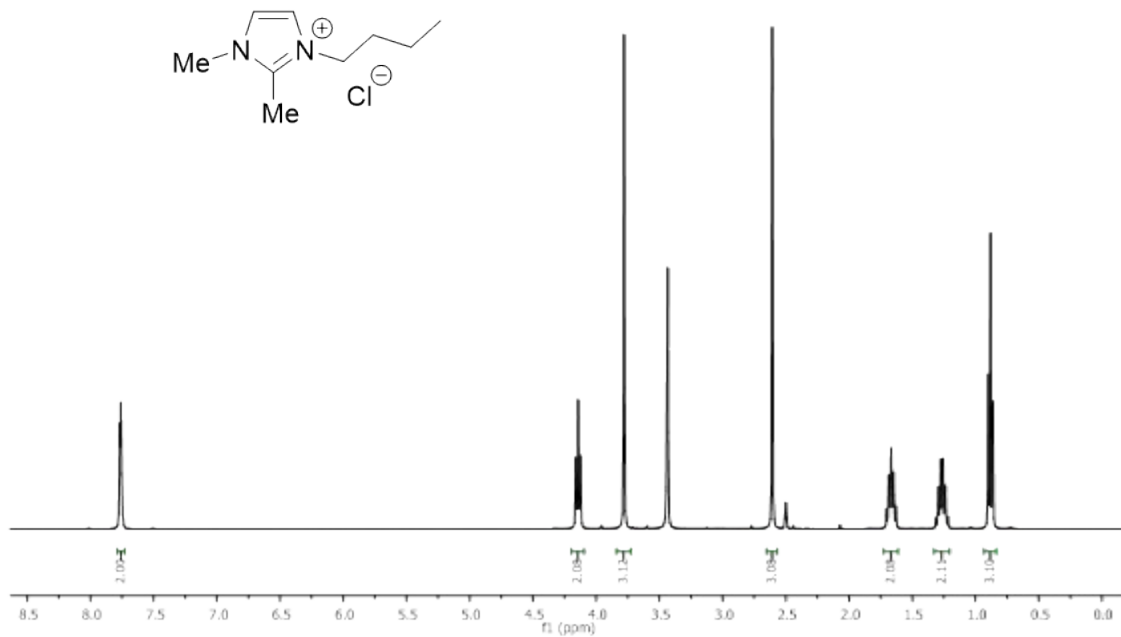

Figure

re S1. <sup>1</sup>H NMR spectrum for compound [BMMIm][Cl] in DMSO-*d*<sub>6</sub>, 400 MHz.

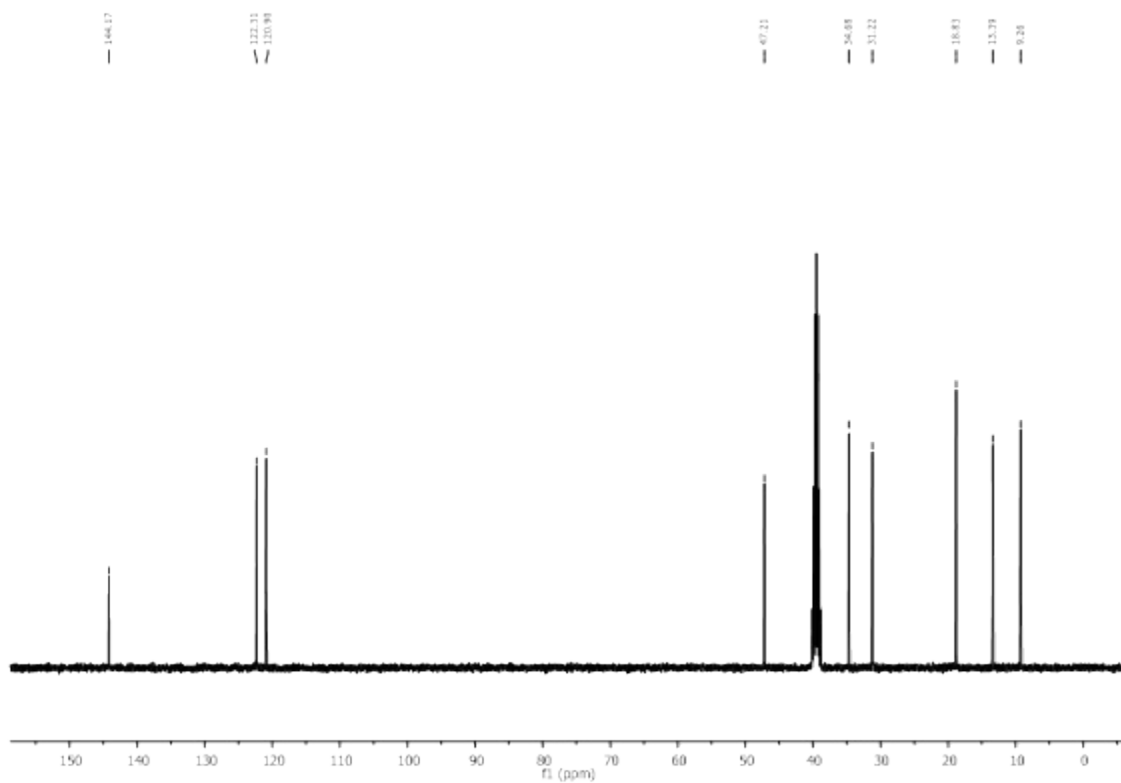

Figure

re S2. <sup>13</sup>C NMR spectrum for compound [BMMIm][Cl] in DMSO-*d*<sub>6</sub>, 101.6 MHz.

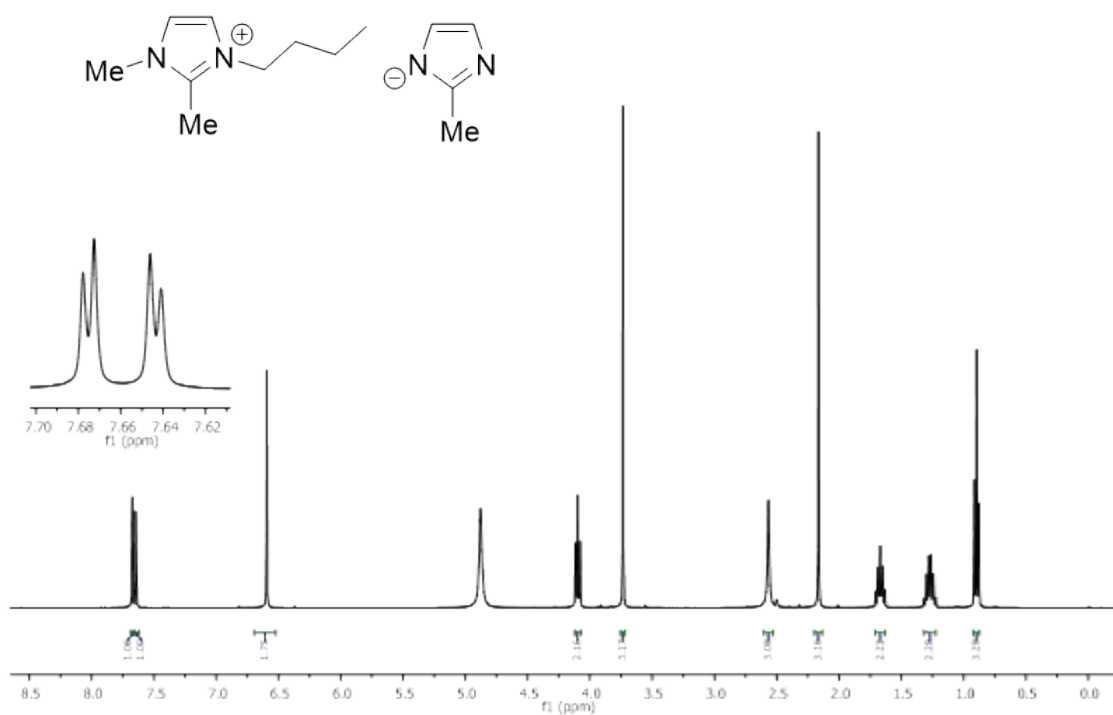

**Figure S3.**  $^1\text{H}$  NMR spectrum for compound [BMMIm][2-MeIm] in  $\text{DMSO-}d_6$ , 400 MHz.

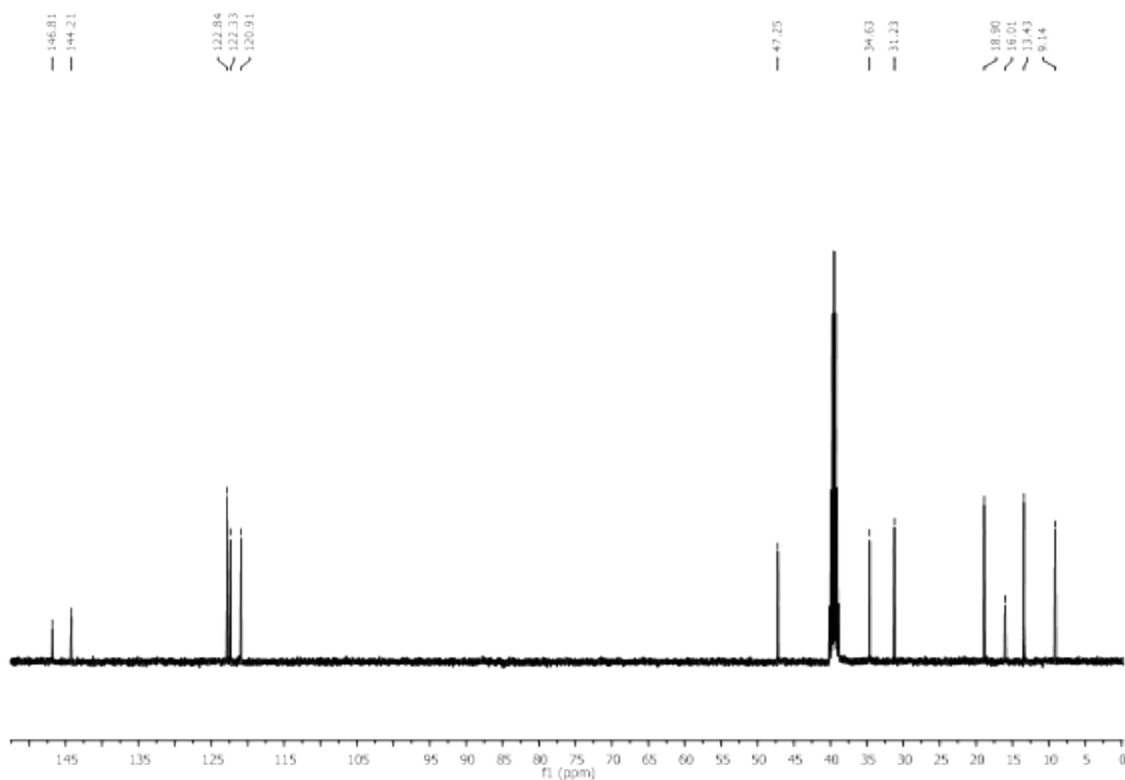

**Figure S4.**  $^{13}\text{C}$  NMR spectrum for compound [BMMIm][2-MeIm] in  $\text{DMSO-}d_6$ , 101.6 MHz.

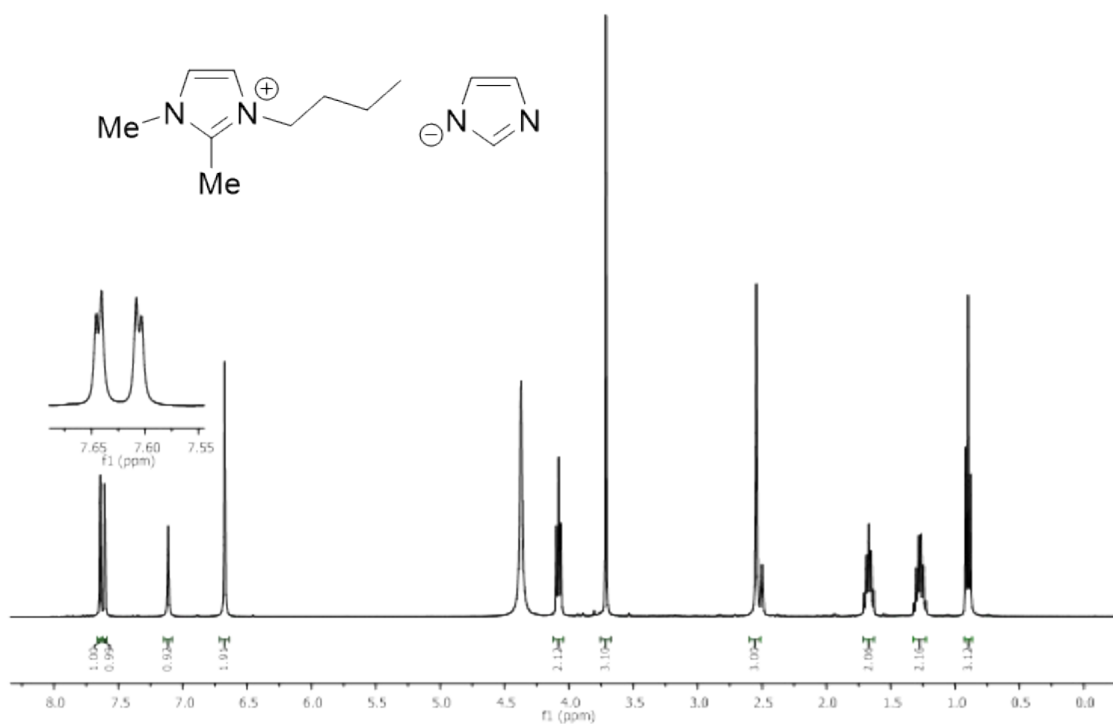

**Figure S5.**  $^1\text{H}$  NMR spectrum for compound [BMMIm][Im] in  $\text{DMSO-}d_6$ , 400 MHz.

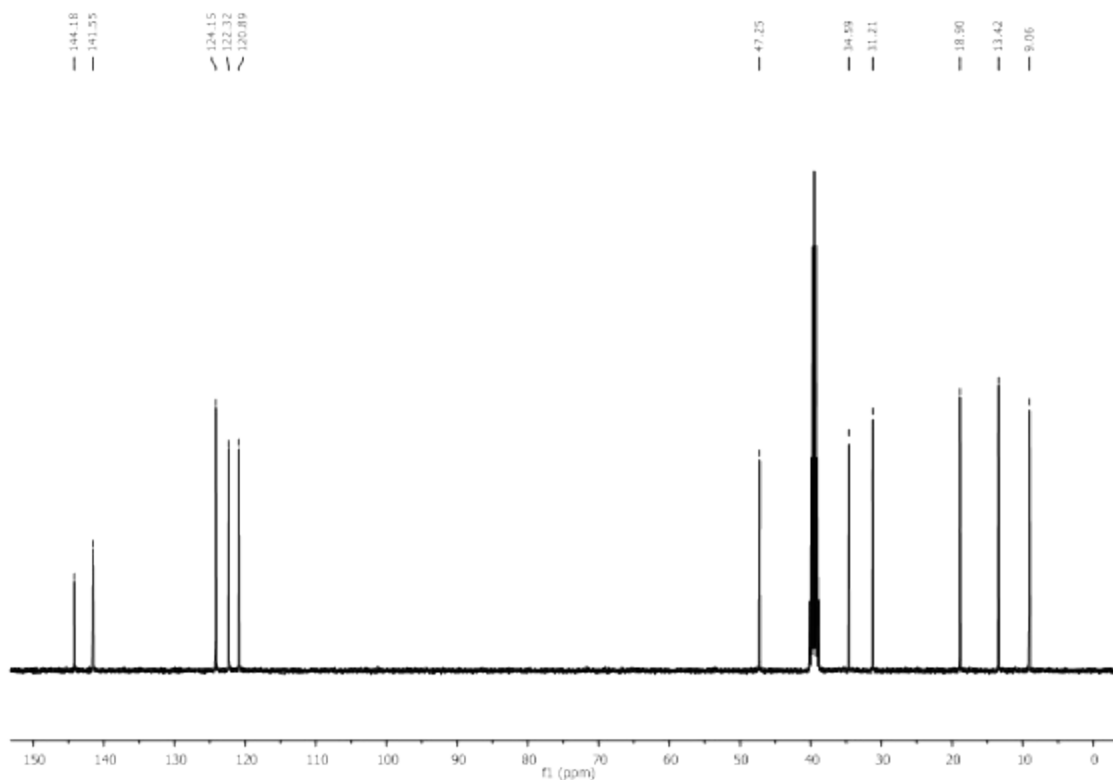

**Figure S6.**  $^{13}\text{C}$  NMR spectrum for compound [BMMIm][Im] in  $\text{DMSO-}d_6$ , 101.6 MHz.

### 3. NMR Experiments

#### 3.1 Sample preparation

IL solutions used for the diffusion experiments were prepared from pure and dry compounds. Prior to solution preparation, the compounds were dried under vacuum at moderate temperature (50 °C) for 24 h. The solutions were prepared using a DMSO- $d_6$ /D $_2$ O solvent mixture (95:5, v/v). Each solution was prepared individually by weighing the appropriate amount of compound to reach the desired concentration and completing the volume with the DMSO- $d_6$ /D $_2$ O mixture. CO $_2$  capture experiments were performed by bubbling CO $_2$  (99.998% purity, AirLiquide Brasil, Brazil) through 1 mL of the ILs solution for 15 min with a flow rate of approximately 70 mL min $^{-1}$ , followed by transfer of the solution to an NMR tube for analysis.

#### 3.2 $^1\text{H}$ NMR

The figures S7-S10 below show the  $^1\text{H}$  NMR spectra of the solutions of ionic liquids [BMMIm][Im] and [BMMIm][2-MeIm] at the different concentrations evaluated, before and after CO $_2$  bubbling.

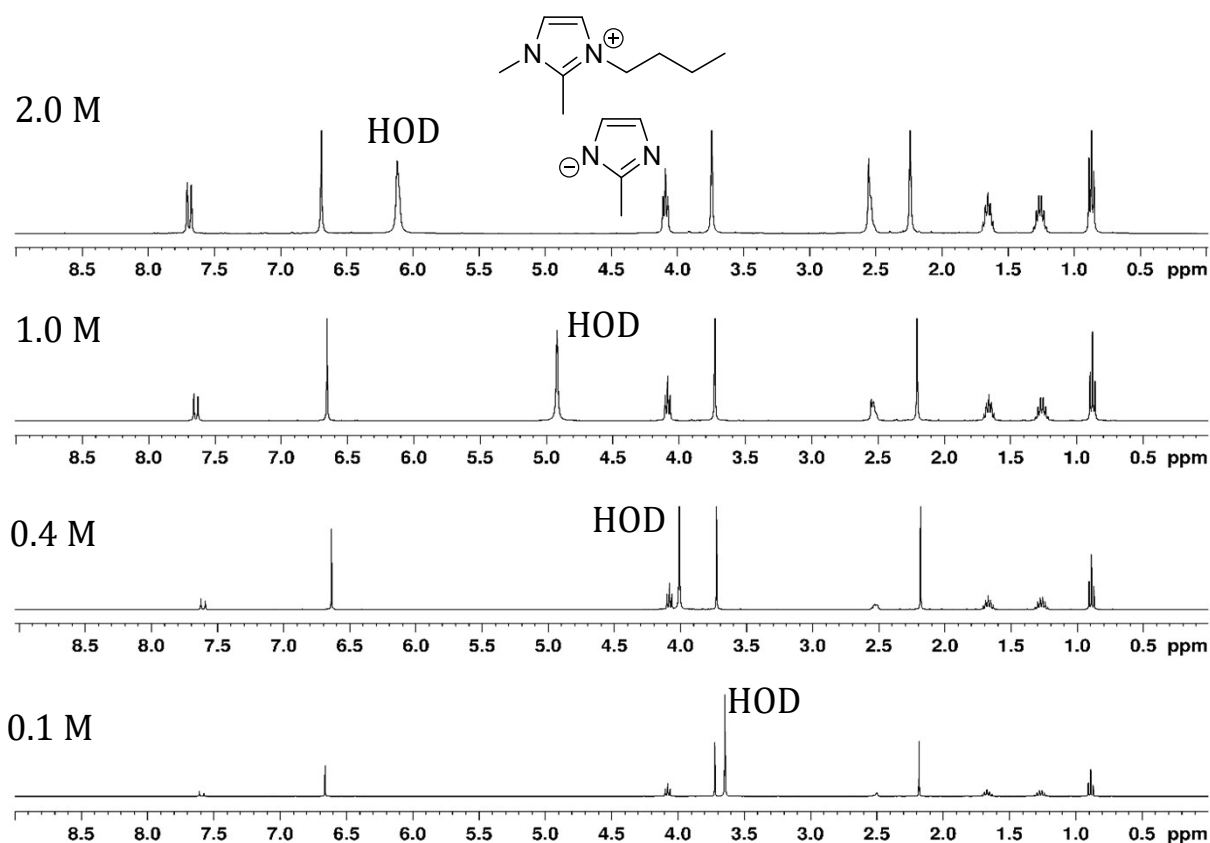

**Figure S7.**  $^1\text{H}$  NMR spectra of [BMMIm][2-MeIm] at different concentrations in DMSO- $d_6$ /D $_2$ O solvent mixture (95:5, v/v), 400 MHz.

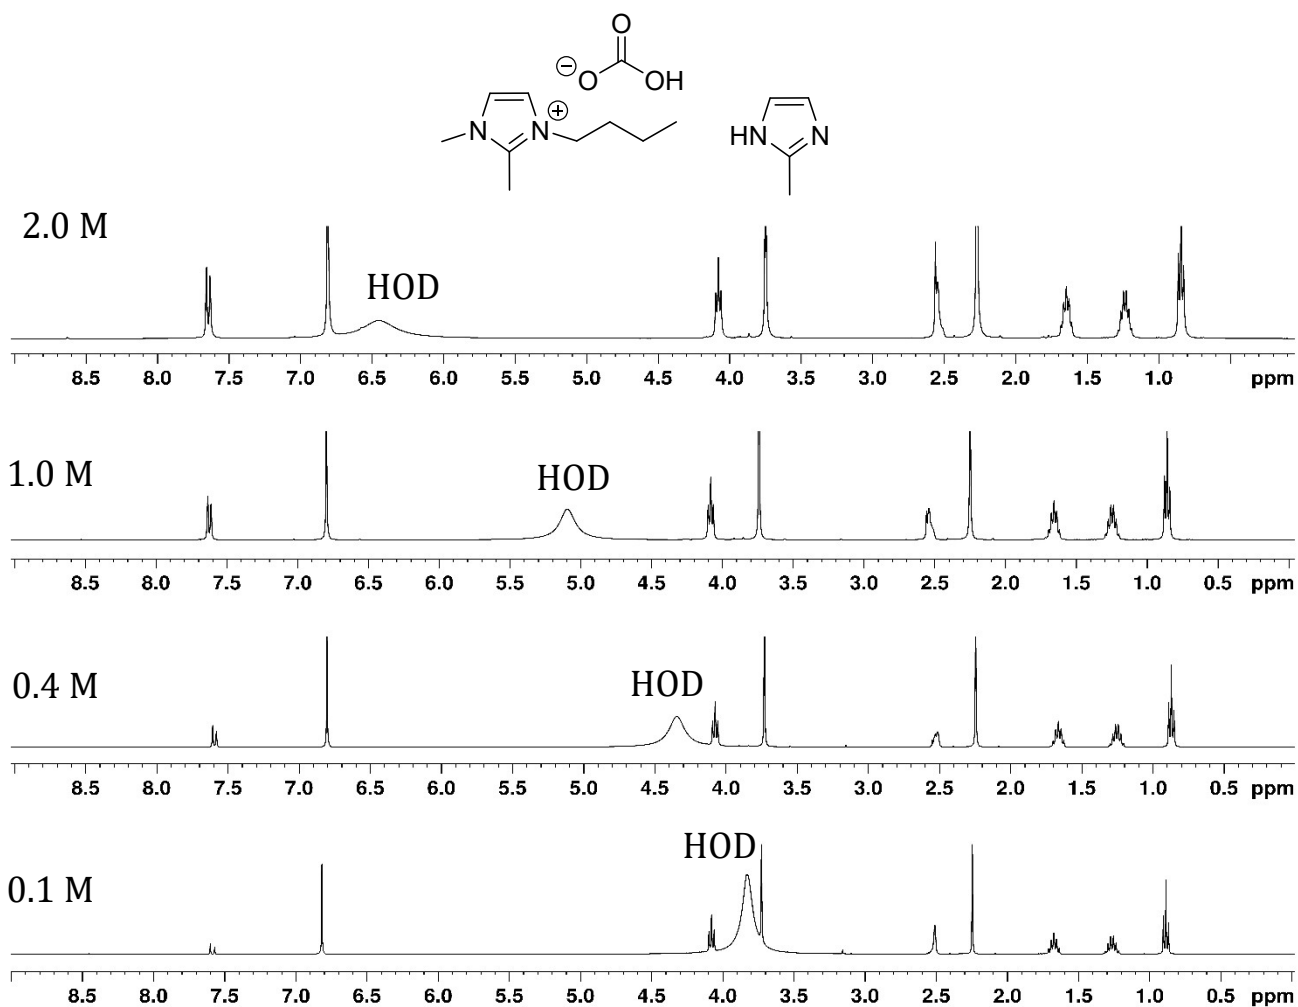

**Figure S8.** <sup>1</sup>H NMR spectra of [BMMIm][2-MeIm] at different concentrations in DMSO-d<sub>6</sub>/D<sub>2</sub>O solvent mixture (95:5, v/v), 400 MHz, after CO<sub>2</sub> bubbling for 15 minutes.

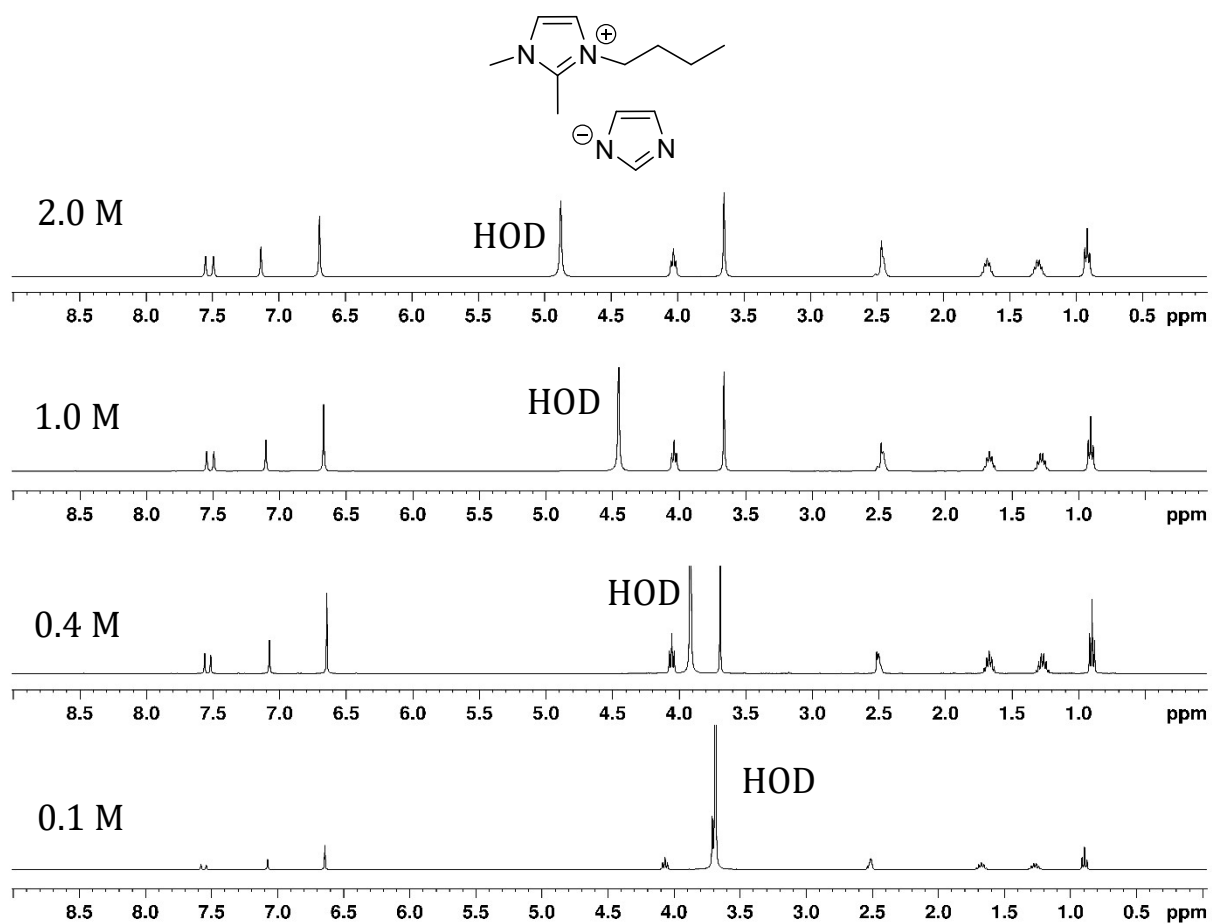

**Figure S9.** <sup>1</sup>H NMR spectra of [BMMIm][Im] at different concentrations in DMSO-d<sub>6</sub>/D<sub>2</sub>O solvent mixture (95:5, v/v), 400 MHz.

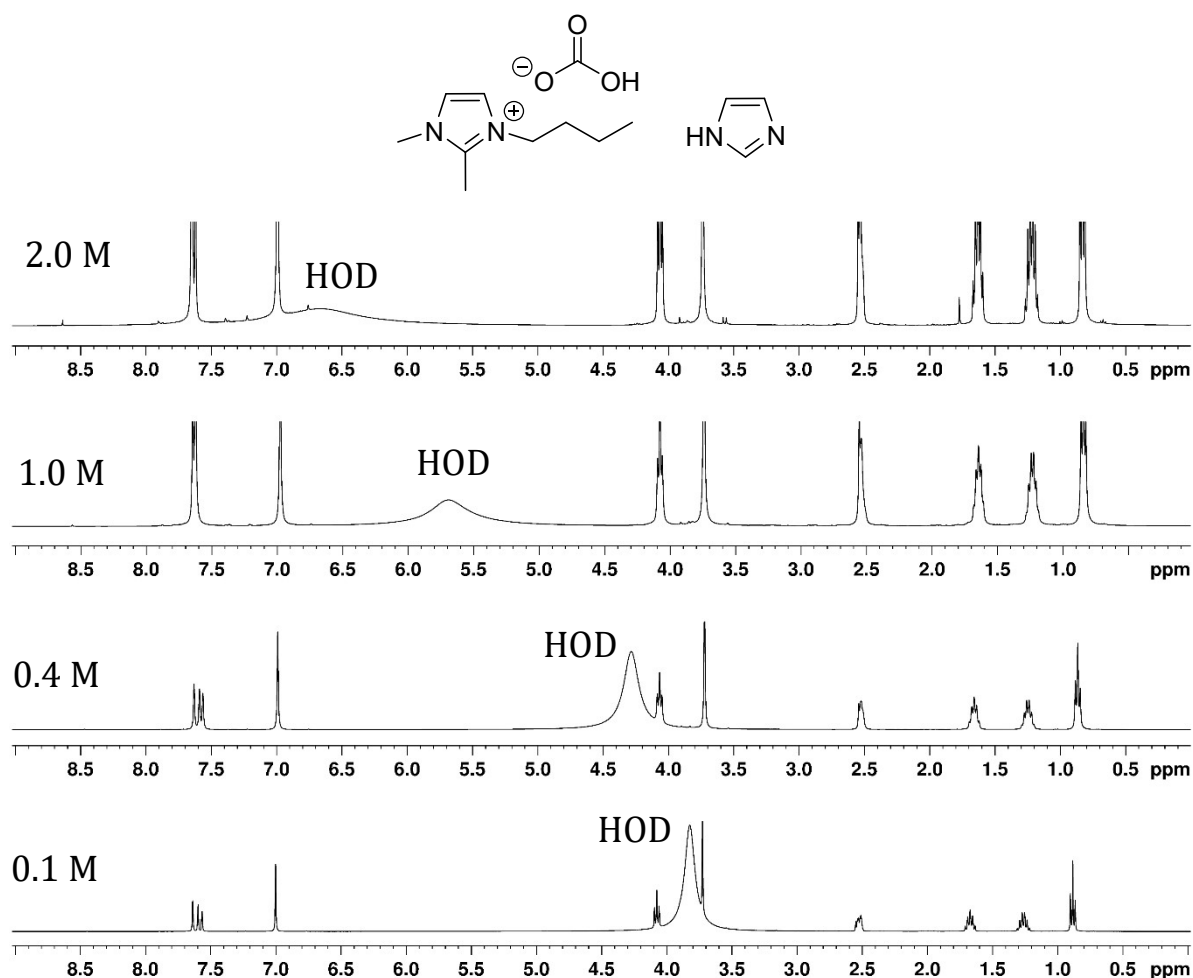

**Figure S10.**  $^1\text{H}$  NMR spectra of [BMMIm][Im] at different concentrations in  $\text{DMSO-}d_6/\text{D}_2\text{O}$  solvent mixture (95:5, v/v), 400 MHz, after  $\text{CO}_2$  bubbling for 15 minutes.

### 3.3 $^{13}\text{C}$ NMR

Figures S11-14 show a quantitative analysis of  $^{13}\text{C}$  NMR after  $\text{CO}_2$  bubbling for 15 min in the solution of [BMMIm][2-MeIm] and [BMMIm][Im] (1.0 M and 2.0 M of each solution), showing the bicarbonate anion at around 160 ppm. For these analysis, the longitudinal relaxation times ( $T_1$ ) were determined by NMR spectroscopy using inversion recovery with power gated decoupling pulse sequence (t1irpg). The experiments were carried out on a Bruker Avance III HD 400 spectrometer, operating at 101.6 MHz for  $^{13}\text{C}$  at 298 K. The relaxation delays ( $\tau$ ) were varied between 0.5 s and 50 s using 8 increments. For each experiment, 42 scans were accumulated with a recycle delay of 80 s. All fitted curves presented standard deviations lower than 0.05 s.

The  $T_1$  values were obtained by fitting the signal areas according to the equation:

$$I[t] = I[0] + P * \exp(-\tau/T1) \quad (1)$$

The values of  $T_1$  and their respective frequencies, for both ILs at 1.0 M and 2.0 M, are shown in Table S1-S4 below:

**Table S1.** T1 values for [BMMIm][2-MeIm] 1.0 M after CO<sub>2</sub> capture.

| <b>Peak #</b> | <b>Frequency (ppm)</b> | <b>T1 (s)</b> |
|---------------|------------------------|---------------|
| 1             | 159.6                  | 14.4          |
| 2             | 144.3                  | 9.8           |
| 3             | 122.6                  | 1.1           |
| 4             | 122.4                  | 1.2           |
| 5             | 121.3                  | 1.0           |
| 6             | 121.1                  | 0.9           |
| 7             | 121.0                  | 1.1           |
| 8             | 47.6                   | 0.5           |
| 9             | 34.8                   | 2.4           |
| 10            | 31.4                   | 0.8           |
| 11            | 19.1                   | 1.2           |
| 12            | 13.7                   | 4.0           |
| 13            | 13.6                   | 2.2           |
| 14            | 9.2                    | 3.9           |

**Table S2.** T1 values for [BMMIm][2-MeIm] 2.0 M after CO<sub>2</sub> capture.

| <b>Peak #</b> | <b>Frequency (ppm)</b> | <b>T1 (s)</b> |
|---------------|------------------------|---------------|
| 1             | 160.1                  | 4.9           |
| 2             | 144.1                  | 4.4           |
| 3             | 122.6                  | 0.5           |
| 4             | 122.4                  | 0.6           |
| 5             | 121.3                  | 0.5           |
| 6             | 121.1                  | 0.5           |
| 7             | 121.0                  | 0.7           |
| 8             | 47.5                   | 0.3           |
| 9             | 34.7                   | 1.7           |
| 10            | 31.4                   | 0.5           |
| 11            | 19.1                   | 0.8           |
| 12            | 13.6                   | 2.2           |
| 13            | 13.5                   | 1.7           |
| 14            | 9.2                    | 2.2           |

**Table S3.** T1 values for [BMMIm][Im] 1.0 M after CO<sub>2</sub> capture.

| <b>Peak #</b> | <b>Frequency (ppm)</b> | <b>T1 (s)</b> |
|---------------|------------------------|---------------|
| <b>1</b>      | 159.7                  | 14.2          |
| <b>2</b>      | 144.2                  | 8.8           |
| <b>3</b>      | 135.8                  | 1.8           |
| <b>4</b>      | 122.7                  | 0.7           |
| <b>5</b>      | 122.1                  | 1.4           |
| <b>6</b>      | 121.3                  | 0.7           |
| <b>7</b>      | 47.7                   | 0.5           |
| <b>8</b>      | 35                     | 2.3           |
| <b>9</b>      | 31.6                   | 0.8           |
| <b>10</b>     | 19.3                   | 1.2           |
| <b>11</b>     | 13.8                   | 2.1           |
| <b>12</b>     | 9.4                    | 3.7           |

**Table S4.** T1 values for [BMMIm][Im] 2.0 M after CO<sub>2</sub> capture.

| <b>Peak #</b> | <b>Frequency (ppm)</b> | <b>T1 (s)</b> |
|---------------|------------------------|---------------|
| <b>1</b>      | 160.1                  | 2.6           |
| <b>2</b>      | 144.2                  | 5.5           |
| <b>3</b>      | 135.6                  | 1.2           |
| <b>4</b>      | 122.5                  | 0.9           |
| <b>5</b>      | 121.9                  | 1.1           |
| <b>6</b>      | 121.1                  | 0.3           |
| <b>7</b>      | 47.6                   | 0.6           |
| <b>8</b>      | 34.8                   | 2.0           |
| <b>9</b>      | 31.4                   | 0.7           |
| <b>10</b>     | 19.1                   | 1.1           |
| <b>11</b>     | 13.5                   | 2.0           |
| <b>12</b>     | 9.2                    | 2.7           |

The fitting curves for the signals with the higher values are shown in Figures S11-S18 below:

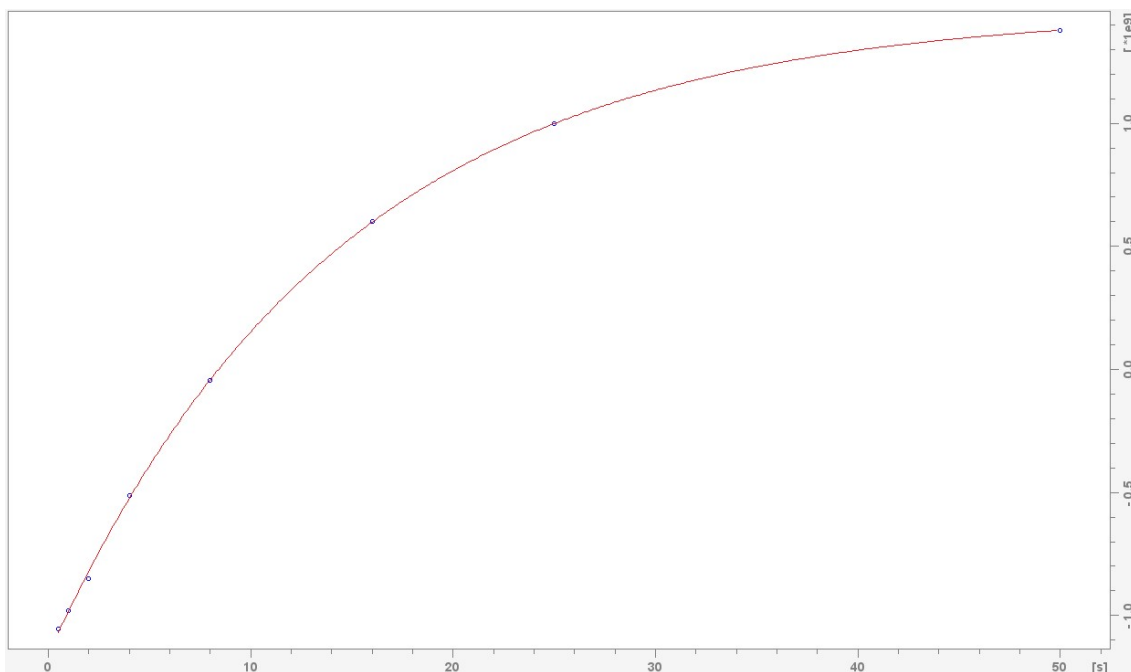

**Figure S11.** Exponential fitting curve used for T1 determination of signal #1 (159.6 ppm) for [BMMIm][MeIm] 1.0 M after CO<sub>2</sub> capture.

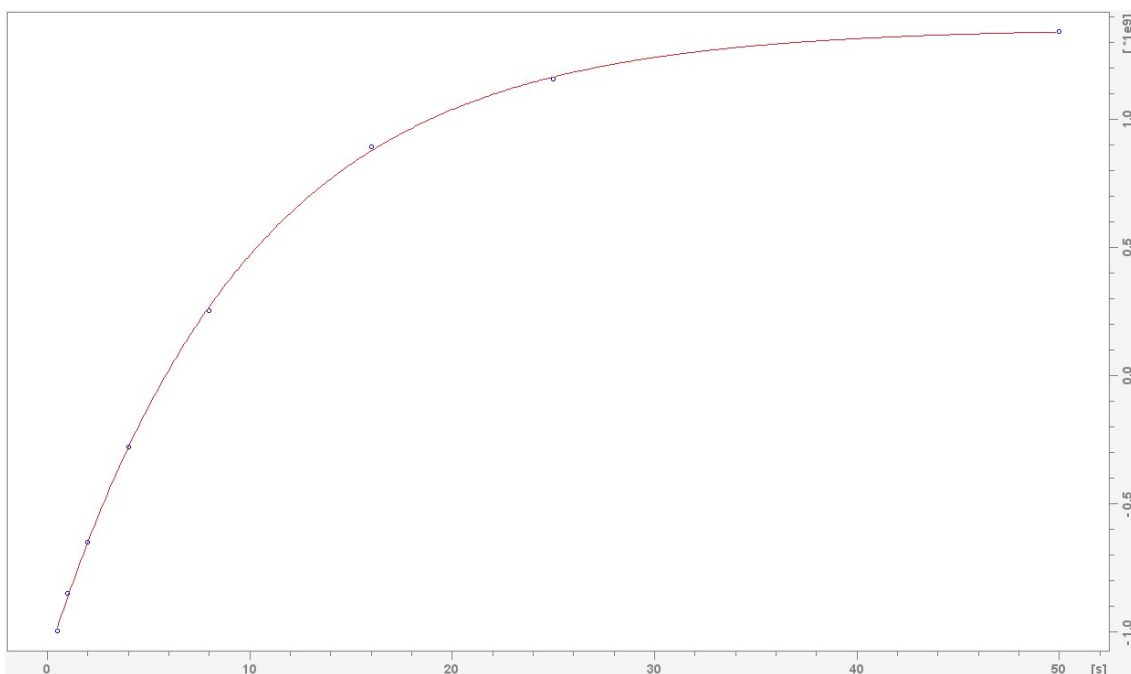

**Figure S12.** Exponential fitting curve used for T1 determination of signal #2 (144.3 ppm) for [BMMIm][MeIm] 1.0 M after CO<sub>2</sub> capture.

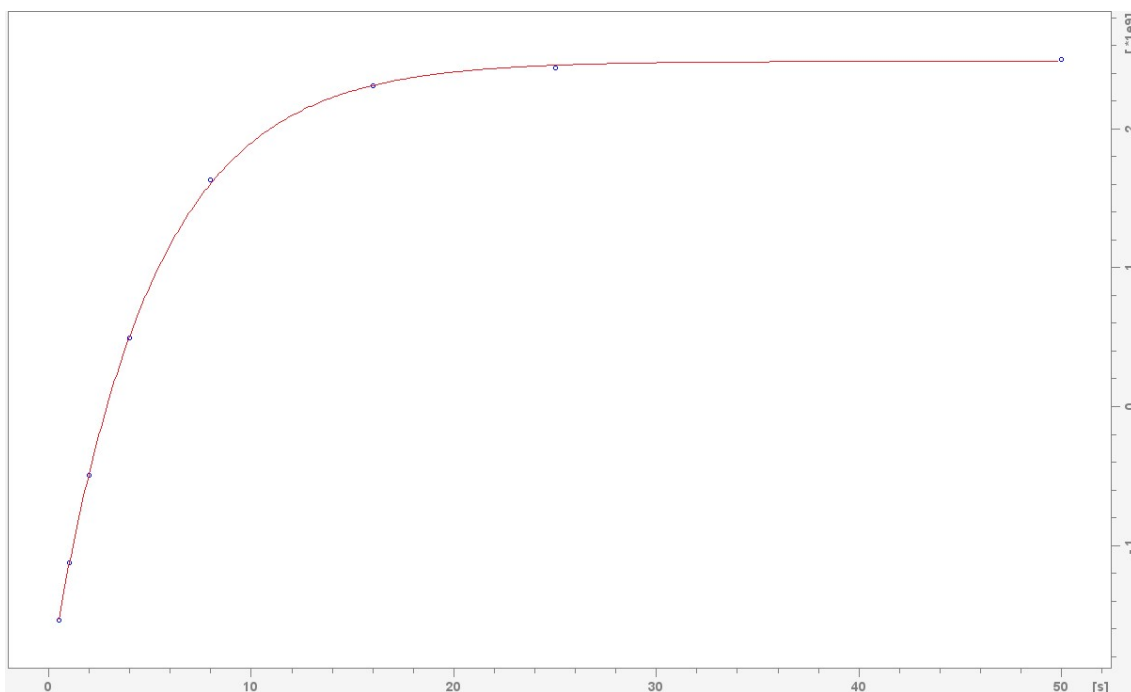

**Figure S13.** Exponential fitting curve used for T1 determination of signal #1 (160.1 ppm) for [BMMIm][MeIm] 2.0 M after CO<sub>2</sub> capture.

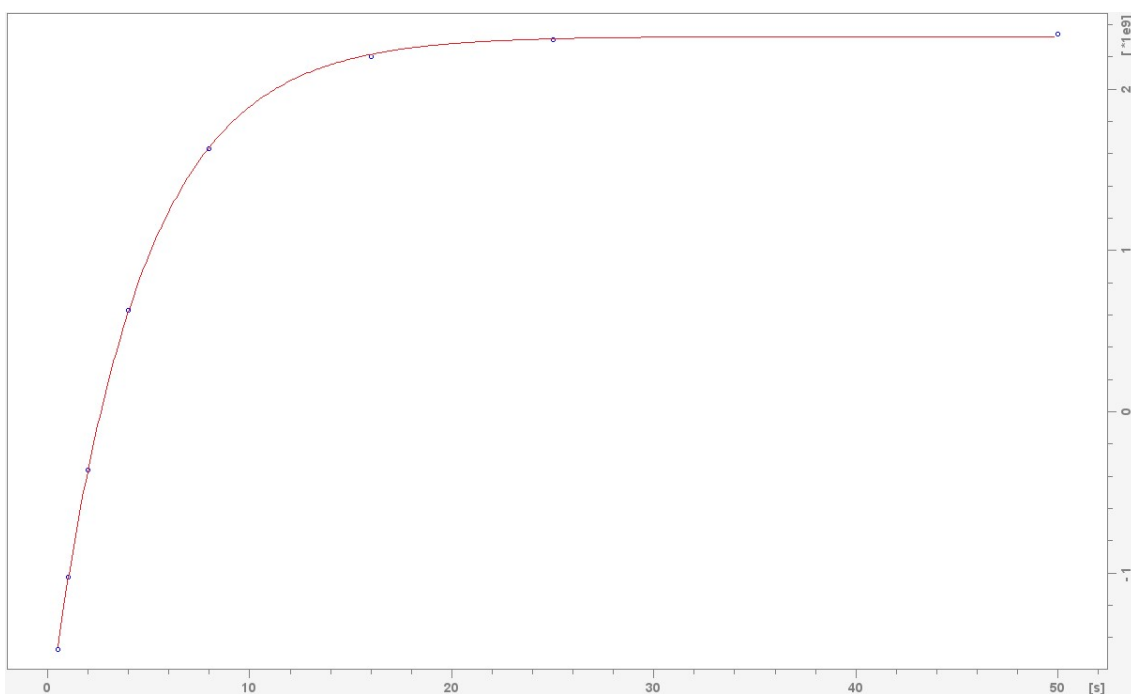

**Figure S14.** Exponential fitting curve used for T1 determination of signal #2 (144.1 ppm) for [BMMIm][MeIm] 2.0 M after CO<sub>2</sub> capture.

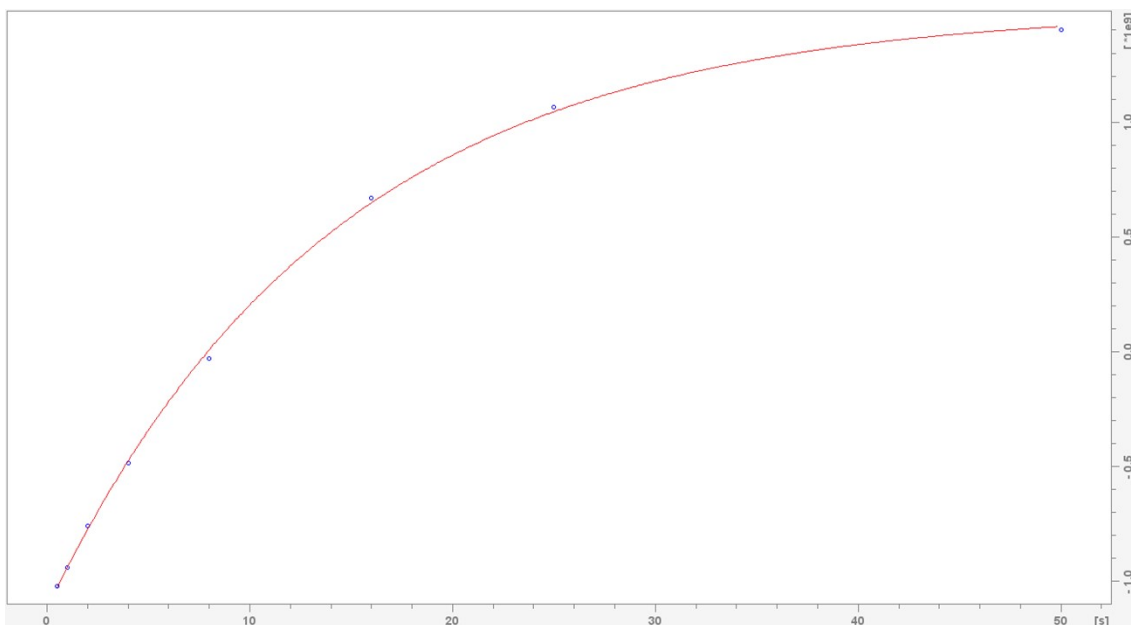

**Figure S15.** Exponential fitting curve used for T1 determination of signal #1 (159.7 ppm) for [BMMIm][Im] 1.0 M after CO<sub>2</sub> capture.

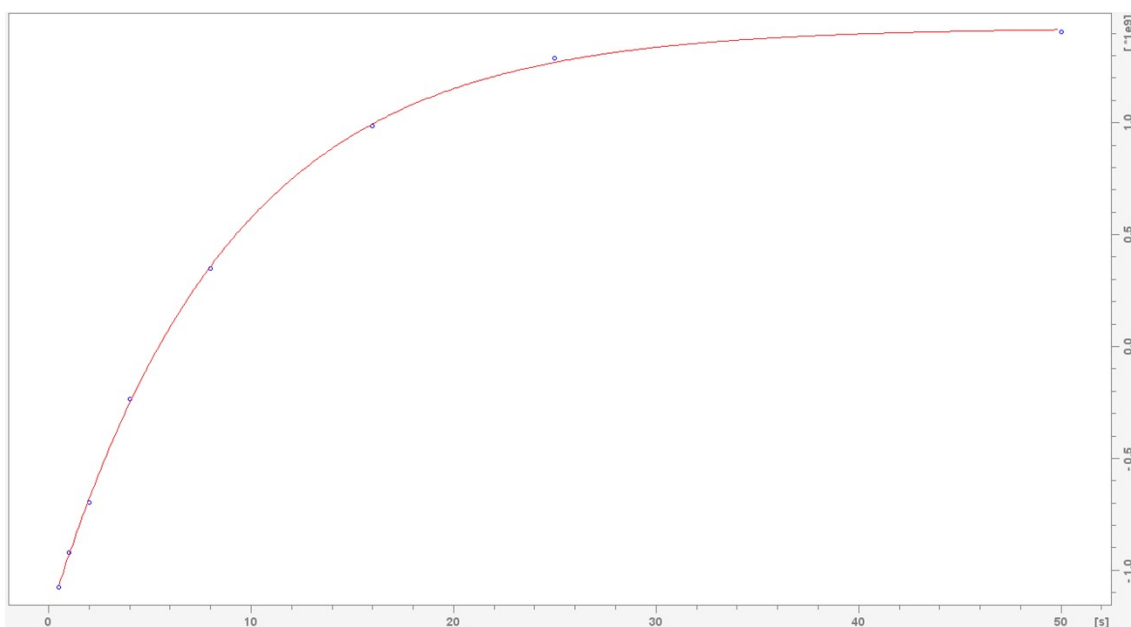

**Figure S16.** Exponential fitting curve used for T1 determination of signal #2 (144.2 ppm) for [BMMIm][Im] 1.0 M after CO<sub>2</sub> capture.

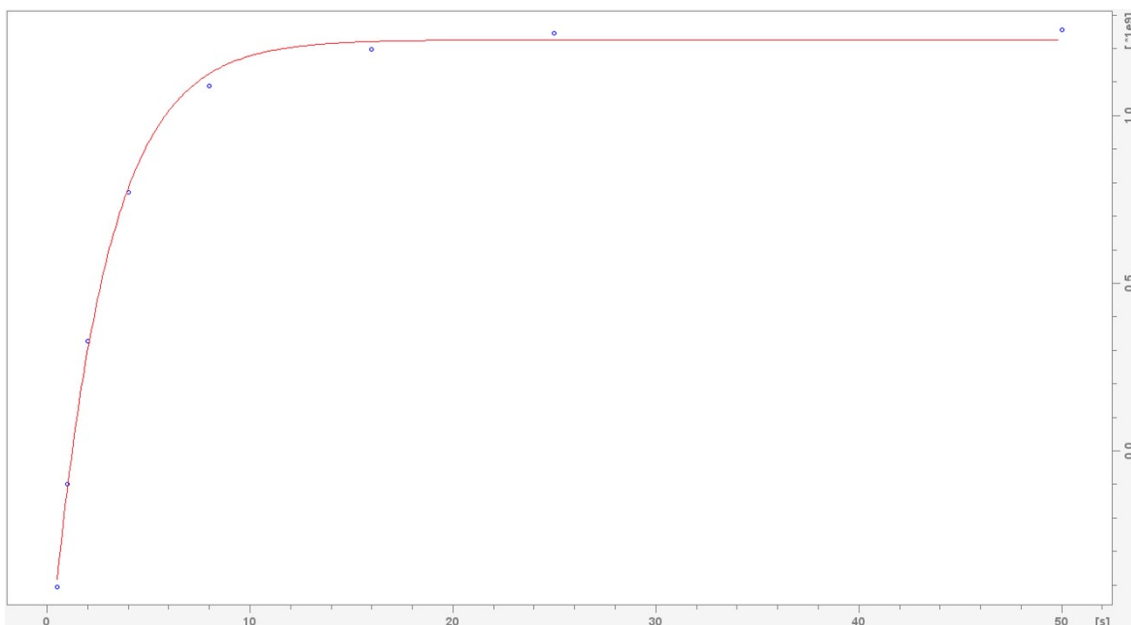

**Figure S17.** Exponential fitting curve used for T1 determination of signal #1 (160.1 ppm) for [BMMIm][Im] 2.0 M after CO<sub>2</sub> capture.

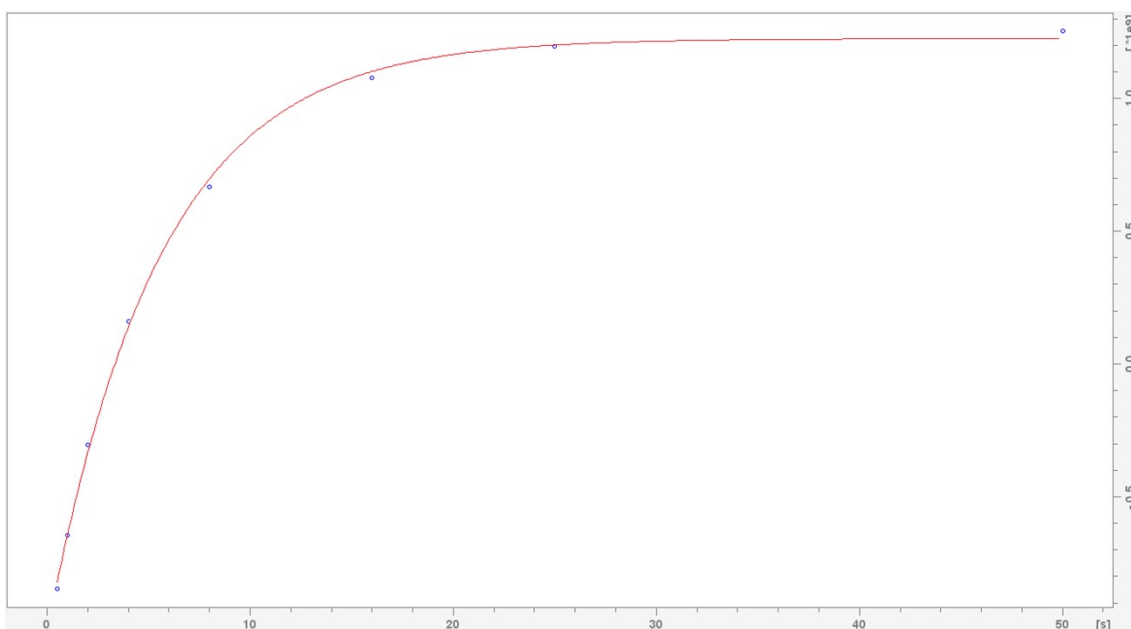

**Figure S18.** Exponential fitting curve used for T1 determination of signal #2 (144.2 ppm) for [BMMIm][Im] 2.0 M after CO<sub>2</sub> capture.

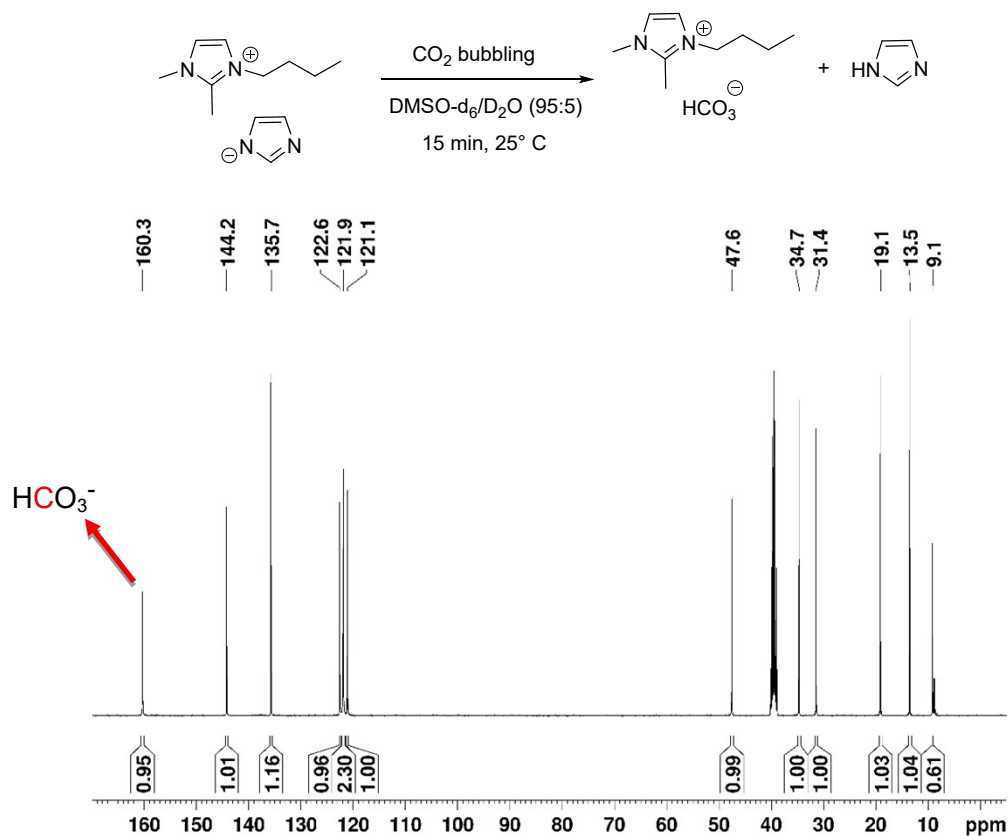

**Figure S19.** Quantitative <sup>13</sup>C NMR analysis for [BMMIm][Im] 2.0 M solution in DMSO-d<sub>6</sub>/D<sub>2</sub>O solvent mixture (95:5, v/v), 101.6 MHz, d1: 40 s.

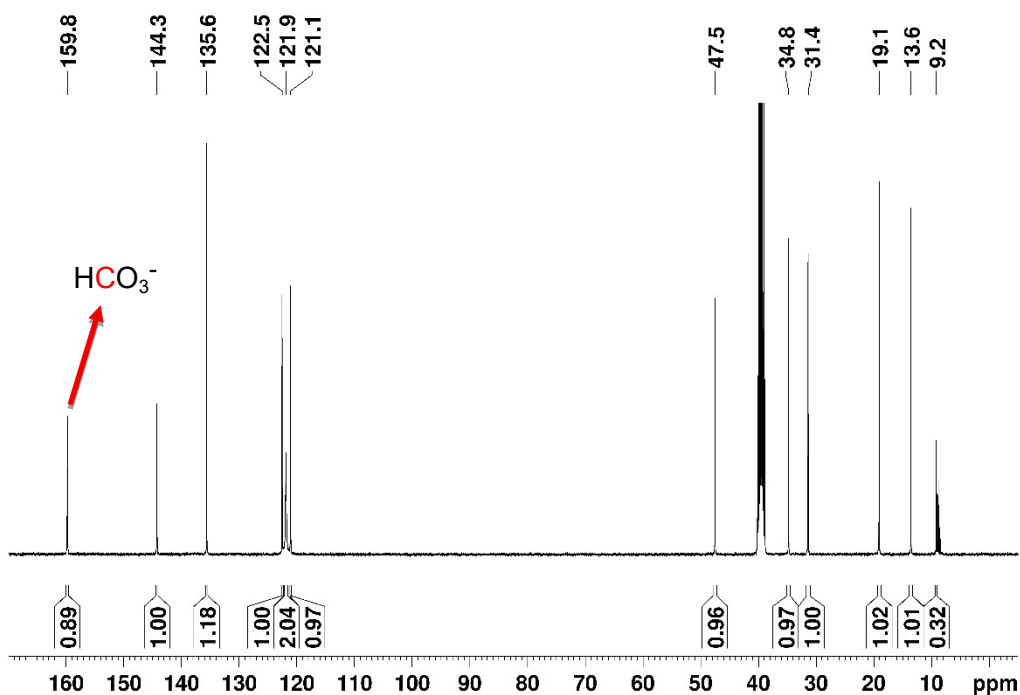

**Figure S20.** Quantitative <sup>13</sup>C NMR analysis for [BMMIm][Im] 1.0 M solution in DMSO-d<sub>6</sub>/D<sub>2</sub>O solvent mixture (95:5, v/v), 101.6 MHz, d1: 80 s.

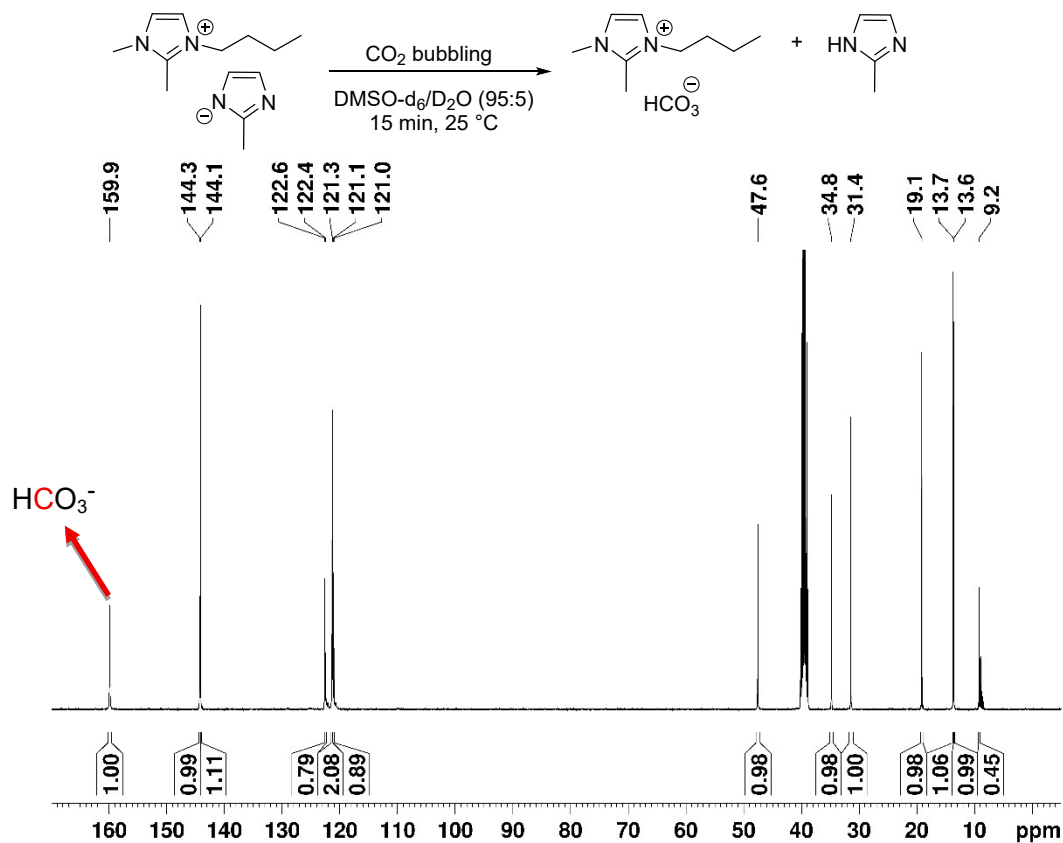

**Figure S21.** Quantitative  $^{13}\text{C}$  NMR analysis for [BMMIm][2-MeIm] 2.0 M solution in DMSO- $\text{d}_6/\text{D}_2\text{O}$  solvent mixture (95:5, v/v), 101.6 MHz, d1: 40 s.

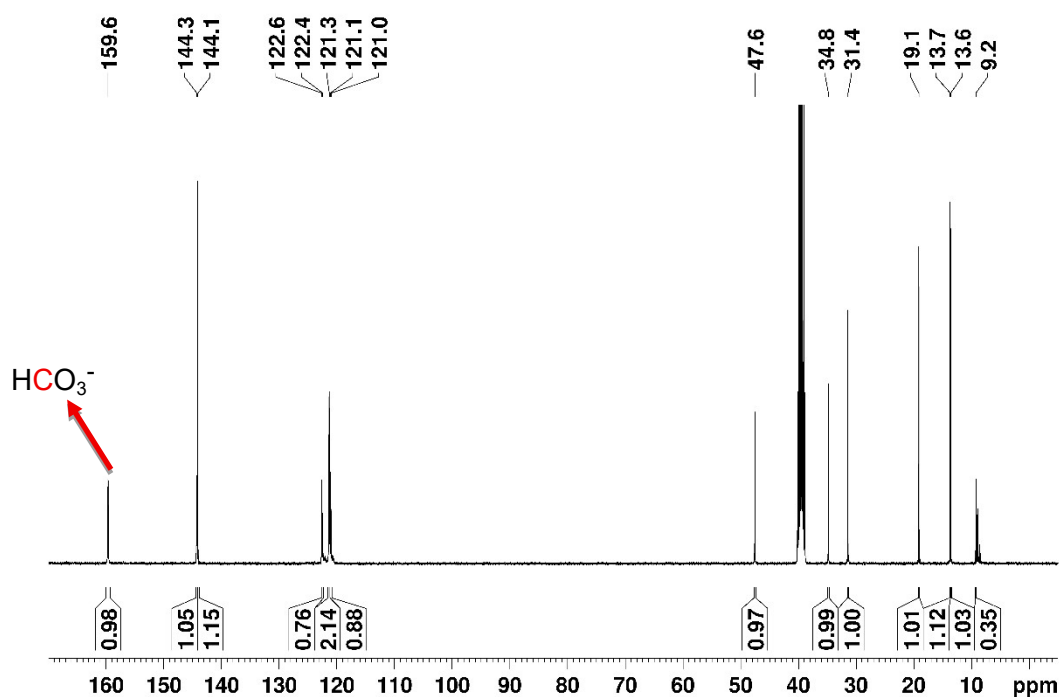

**Figure S22.** Quantitative  $^{13}\text{C}$  NMR analysis for [BMMIm][2-MeIm] 1.0 M solution in DMSO- $\text{d}_6/\text{D}_2\text{O}$  solvent mixture (95:5, v/v), 101.6 MHz, d1: 80 s.

**Table S5.** Quantitative analysis of bicarbonate ( $\text{HCO}_3^-$ ) formation from  $^{13}\text{C}$  NMR for [BMMIm][Im] and [BMMIm][2-MeIm] at 1.0 M and 2.0 M.

| Ionic Liquid    | Ratio of $\text{HCO}_3^-$ | Ratio of $\text{HCO}_3^-$ |
|-----------------|---------------------------|---------------------------|
|                 | 1.0 M                     | 2.0 M                     |
| [BMMIm][Im]     | 0.89                      | <b>0.95</b>               |
| [BMMIm][2-MeIm] | <b>0.98</b>               | <b>1.0</b>                |

### 3.4 DOSY experiments

All NMR analyses were performed on a Bruker Avance III HD 400 spectrometer, operating at 400 MHz for  $^1\text{H}$  and 101.6 MHz for  $^{13}\text{C}$ .  $^1\text{H}$ -DOSY experiments were performed using the Doneshot45  $^1\text{H}$  pulse sequence with sine-shaped gradients, with the gradient strength varied between 10% and 80%. The parameters p30 (2000 – 2300  $\mu\text{s}$ ), d16 (2 ms), and d20 (90 – 170 ms) were optimized to achieve signal attenuation between 75% and 90%. The Doneshot  $^{13}\text{C}$  pulse sequence with sine-shaped gradients was employed, using d1 = 40 s, p30 = 5000  $\mu\text{s}$ , and d20 values in the range of 300 – 450 ms. The parameters were optimized to obtain signal attenuation between 75% and 90%. DOSY data processing was performed using the General NMR Analysis Toolbox (GNAT), version 2.0.

Figures S23 and S24 show some examples of  $^{13}\text{C}$ -DOSY experiments for 2.0 M solution of [BMMIm][2-MeIm] and 1.0 M solution of [BMMIm][Im], after bubbling  $\text{CO}_2$ .

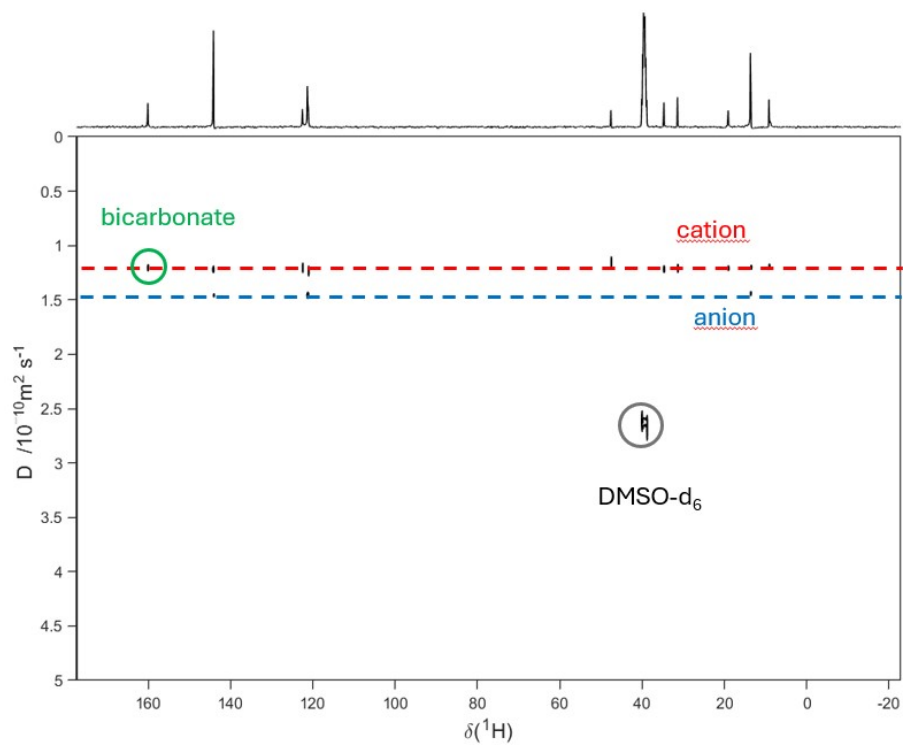

**Figure S23.** [BMMIm][2-MeIm] 2.0 M with CO<sub>2</sub> obtained from the <sup>13</sup>C-DOSY experiments. Cation, anion and bicarbonate are represented in red, blue and green, respectively.

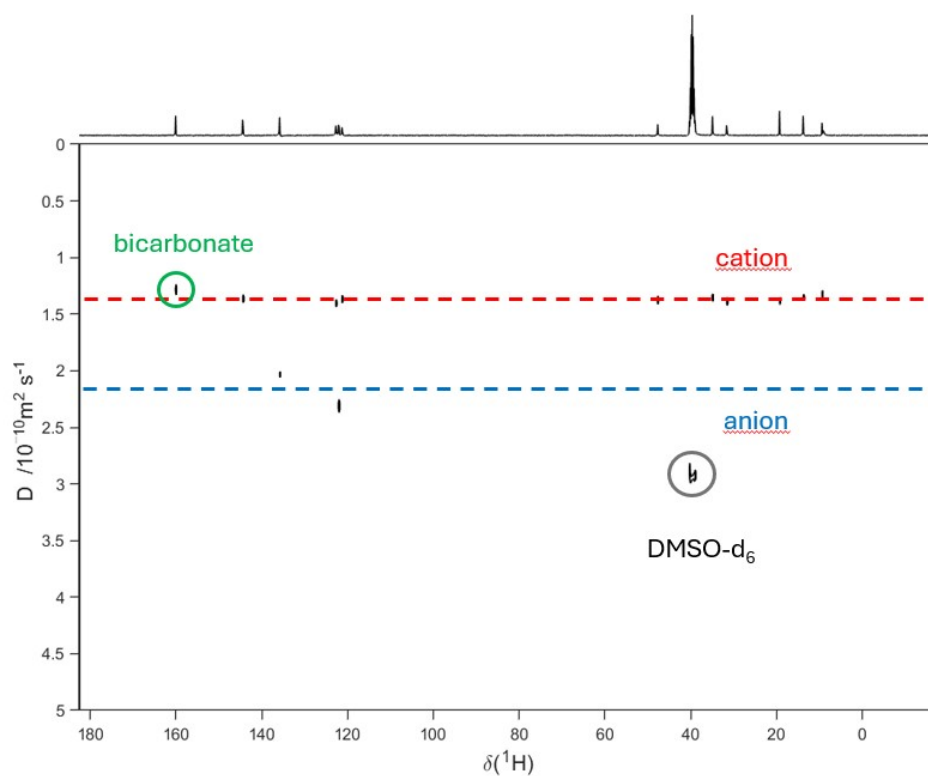

**Figure S24.** [BMMIm][Im] 1.0 M with CO<sub>2</sub> obtained from the <sup>13</sup>C-DOSY experiments. Cation, anion and bicarbonate are represented in red, blue and green, respectively.

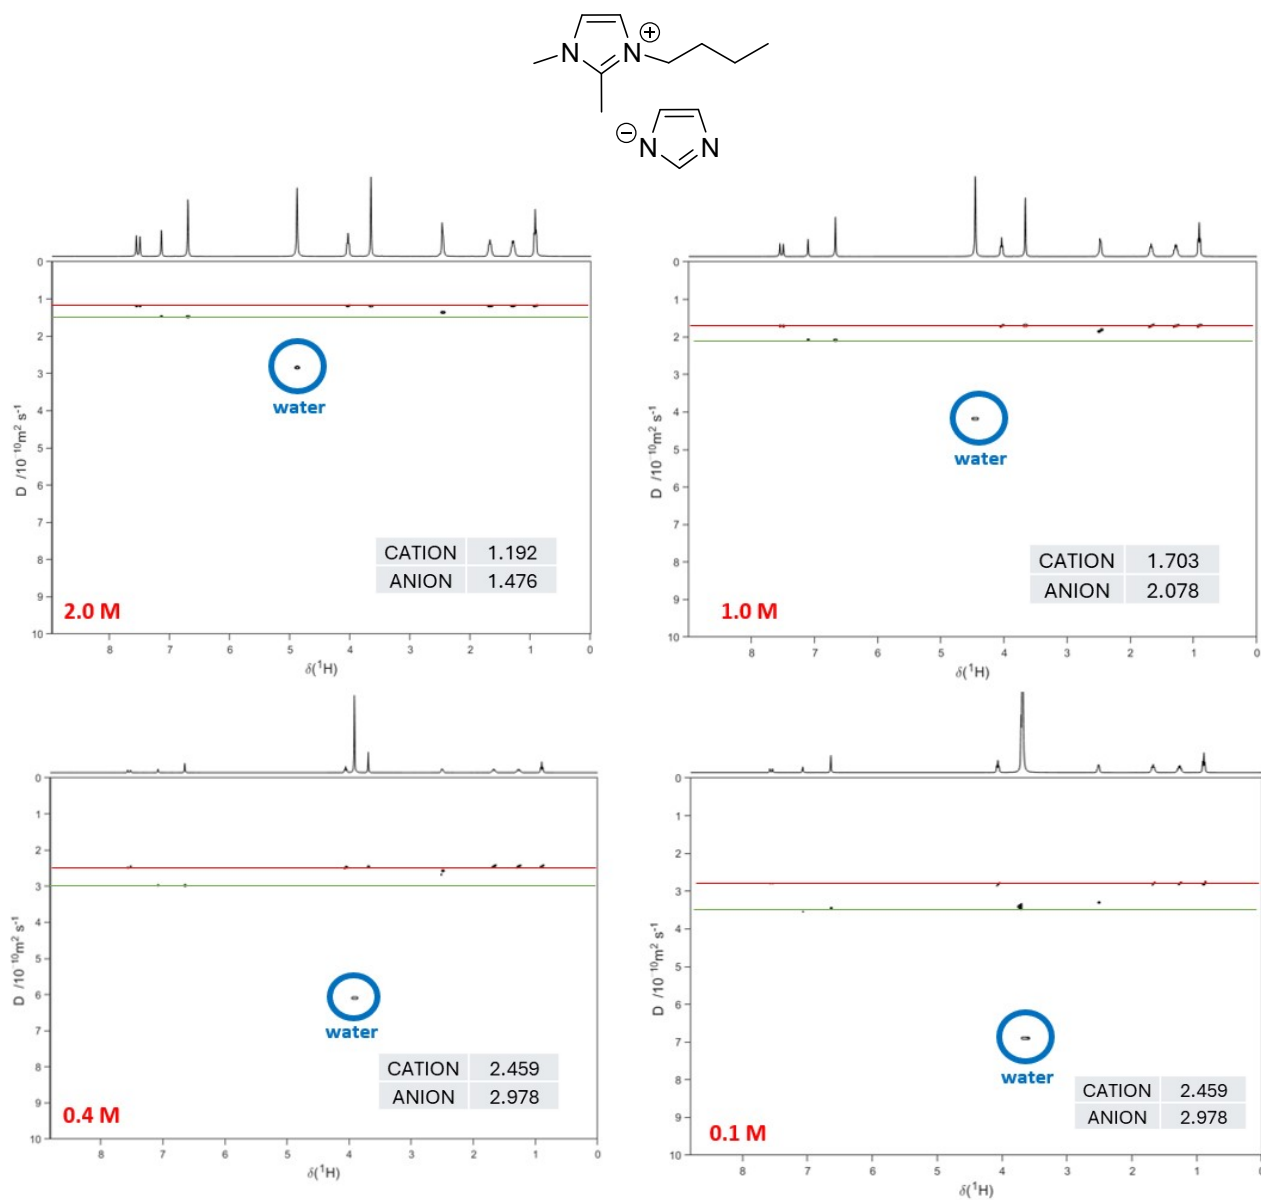

**Figure S25.** [BMMIm][Im] solutions obtained from the  $^1\text{H}$ -DOSY experiments. Cation and anion are represented in red and green, respectively.

Figure S26 shows NMR  $^1\text{H}$ -DOSY experiments for solutions of [BMMIm][Im] after bubbling  $\text{CO}_2$  for 15 min at different concentrations.

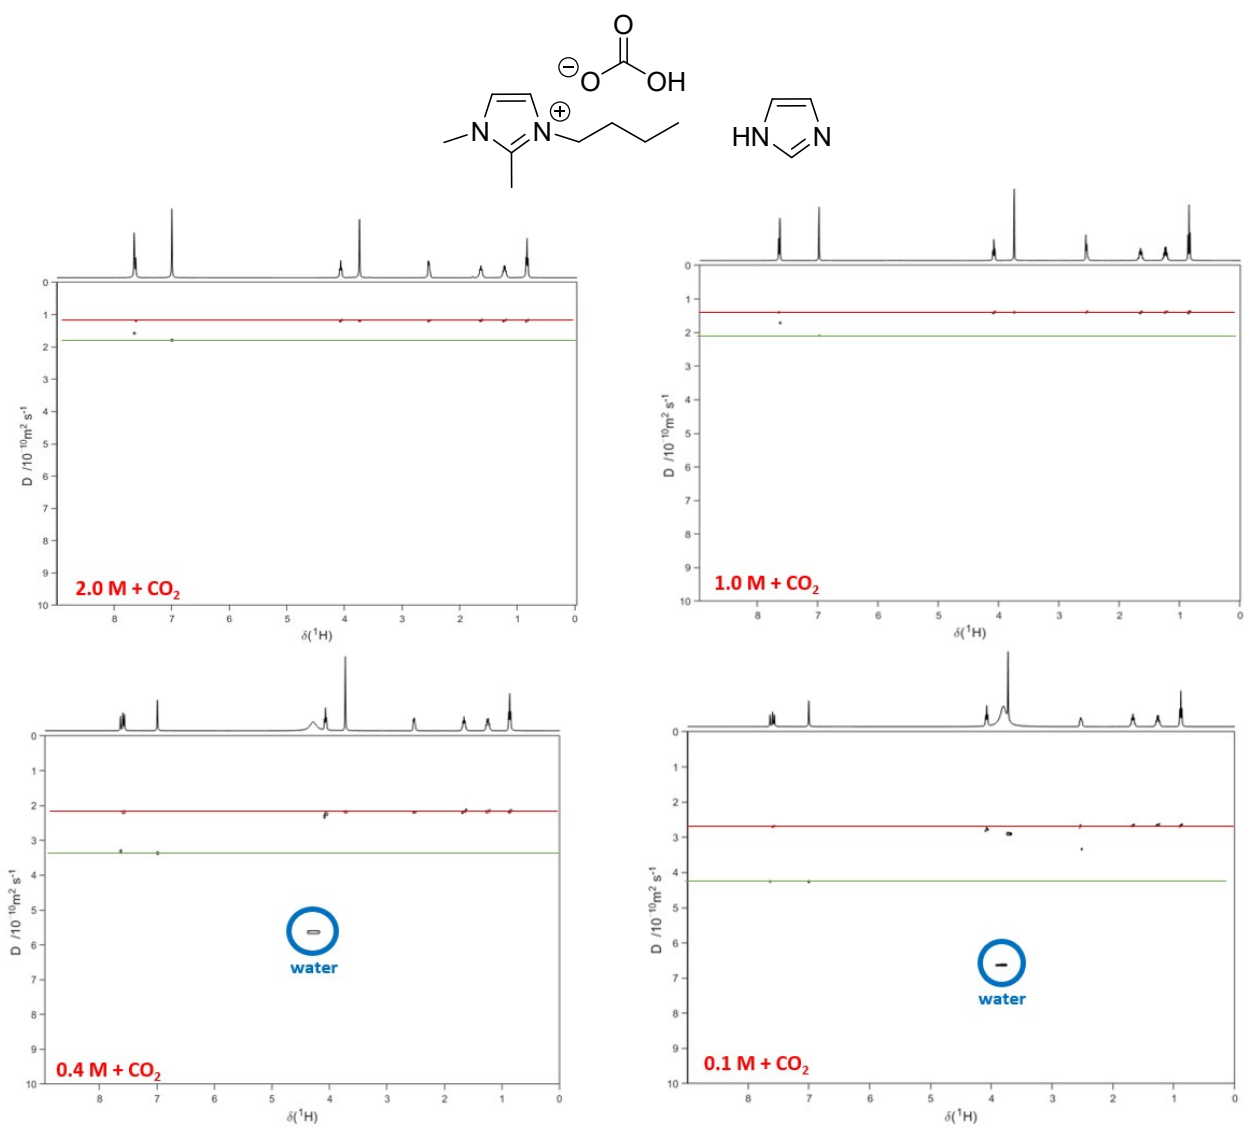

**Figure S26.** [BMMIm][Im] solutions after  $\text{CO}_2$  bubbling obtained from the  $^1\text{H}$ -DOSY experiments. Cation and anion are represented in red and green, respectively.

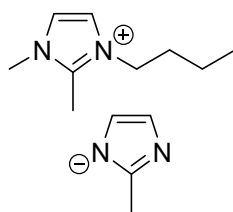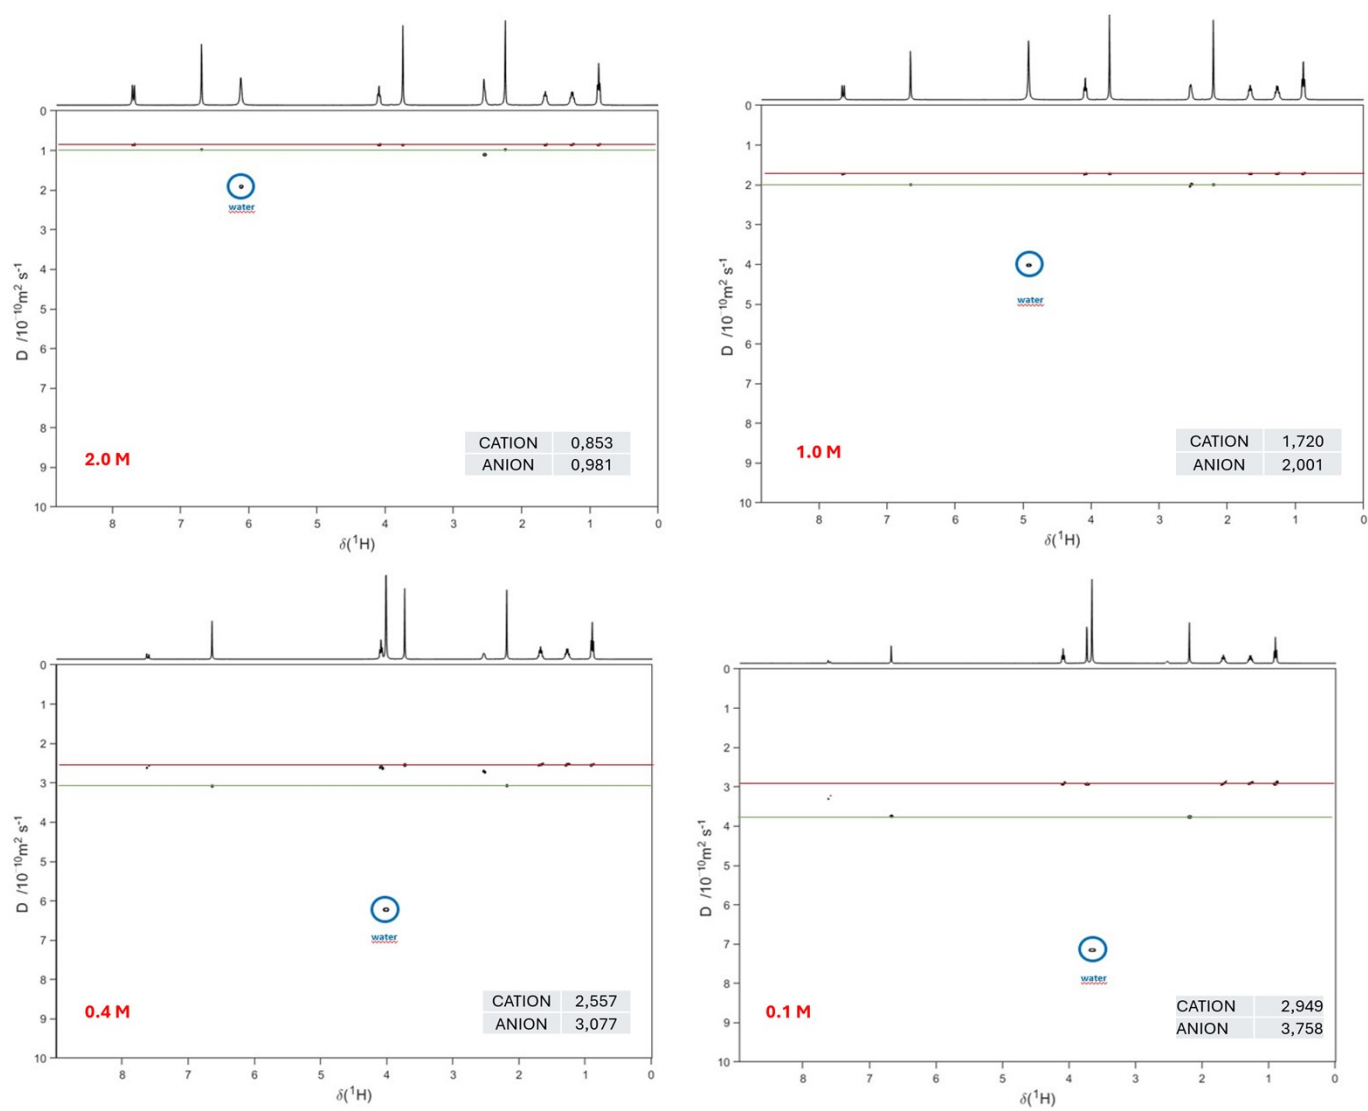

**Figure S27.** [BMMIm][2-MeIm] solutions obtained from the  $^1\text{H}$ -DOSY experiments. Cation and anion are represented in red and green, respectively.

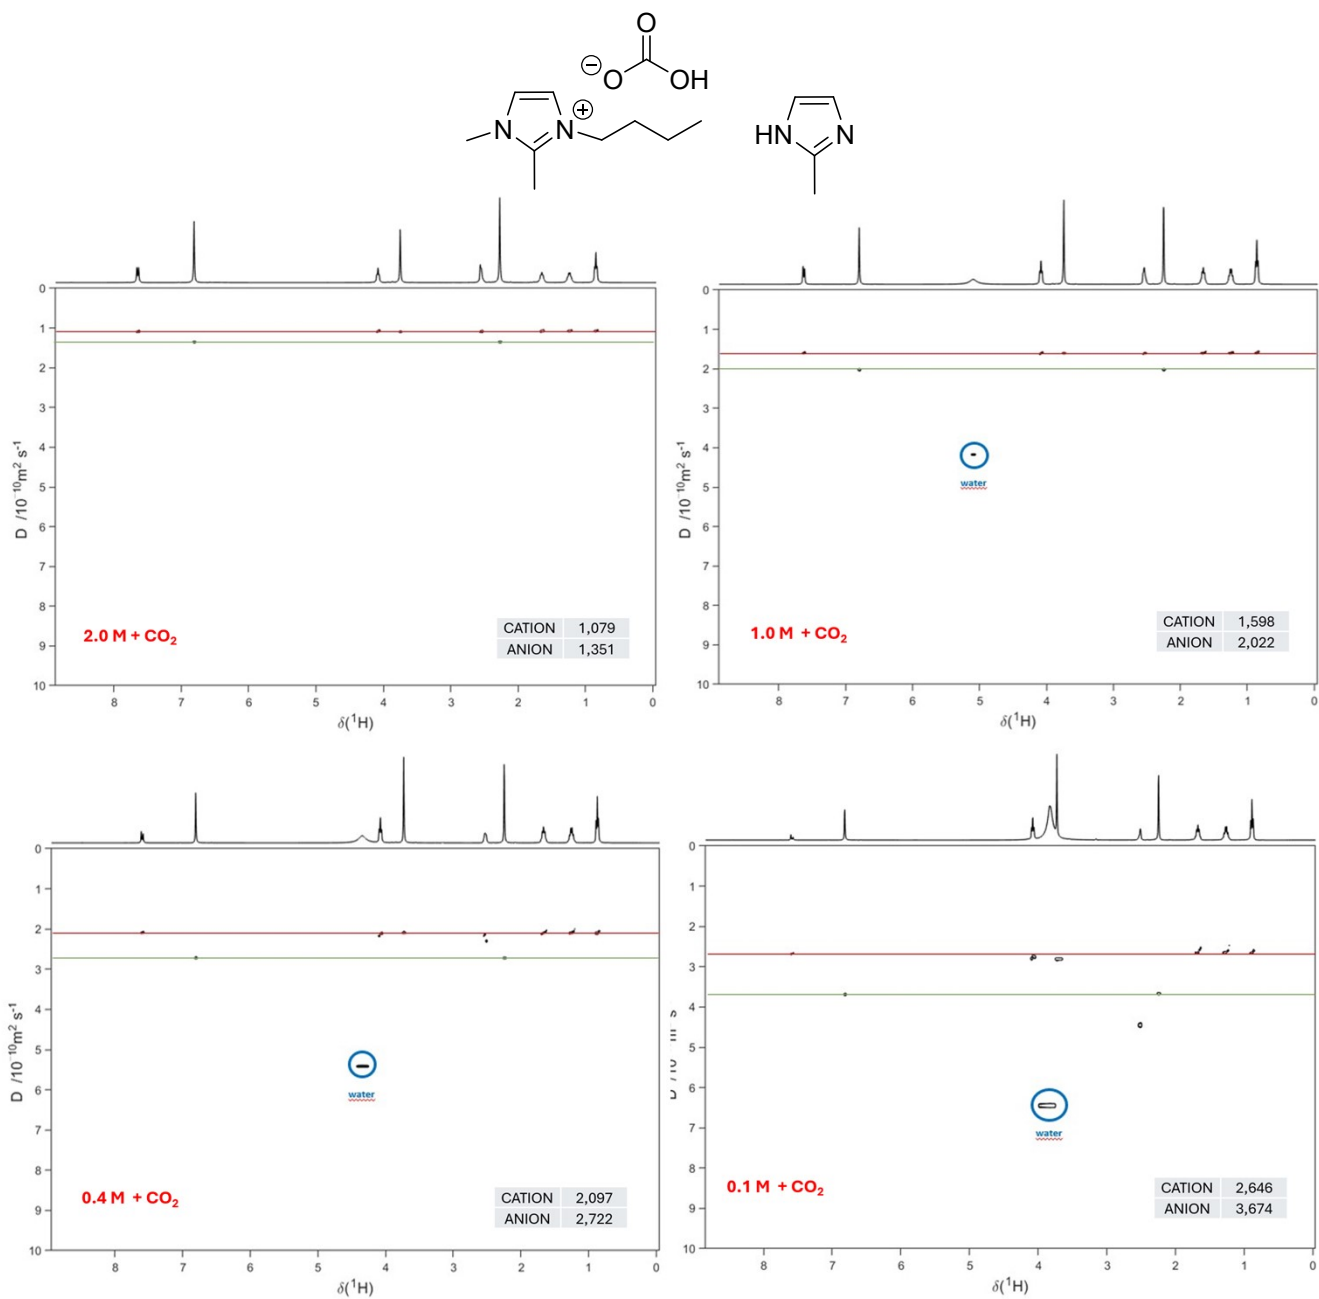

**Figure S28.** [BMMIm][2-MeIm] solutions after CO<sub>2</sub> bubbling obtained from the <sup>1</sup>H-DOSY experiments. Cation and anion are represented in red and green, respectively.

**Table S6.** Diffusion coefficients (D) measured for each signal (frequency) of the <sup>1</sup>H-DOSY spectra of IL [BMMIm][Im] at different concentrations before and after CO<sub>2</sub> bubbling. The colors indicate the signals from: cation in orange, anion in purple, residual solvent in green, water in blue and peaks unrelated to sample in gray.

| [BMMIm][Im] 0.1 M |                                                       |       | [BMMIm][Im] 0.4 M |                                                       |       | [BMMIm][Im] 1.0 M |                                                       |       | [BMMIm][Im] 2.0 M |                                                       |       |
|-------------------|-------------------------------------------------------|-------|-------------------|-------------------------------------------------------|-------|-------------------|-------------------------------------------------------|-------|-------------------|-------------------------------------------------------|-------|
| Frequency (ppm)   | D (10 <sup>-10</sup> m <sup>2</sup> s <sup>-1</sup> ) | Error | Frequency (ppm)   | D (10 <sup>-10</sup> m <sup>2</sup> s <sup>-1</sup> ) | Error | Frequency (ppm)   | D (10 <sup>-10</sup> m <sup>2</sup> s <sup>-1</sup> ) | Error | Frequency (ppm)   | D (10 <sup>-10</sup> m <sup>2</sup> s <sup>-1</sup> ) | Error |
| 0.874             | 2.756                                                 | 0.007 | 0.880             | 2.431                                                 | 0.003 | 0.891             | 1.681                                                 | 0.002 | 0.896             | 1.180                                                 | 0.002 |
| 0.893             | 2.816                                                 | 0.009 | 0.898             | 2.455                                                 | 0.006 | 0.909             | 1.696                                                 | 0.003 | 0.914             | 1.187                                                 | 0.001 |
| 0.911             | 2.825                                                 | 0.009 | 0.916             | 2.467                                                 | 0.004 | 0.926             | 1.714                                                 | 0.002 | 0.932             | 1.197                                                 | 0.001 |
| 1.240             | 2.760                                                 | 0.004 | 1.243             | 2.423                                                 | 0.002 | 1.251             | 1.678                                                 | 0.002 | 1.257             | 1.182                                                 | 0.002 |
| 1.259             | 2.788                                                 | 0.002 | 1.261             | 2.440                                                 | 0.002 | 1.270             | 1.696                                                 | 0.002 | 1.274             | 1.189                                                 | 0.001 |
| 1.277             | 2.816                                                 | 0.002 | 1.280             | 2.453                                                 | 0.001 | 1.288             | 1.705                                                 | 0.002 | 1.293             | 1.196                                                 | 0.001 |
| 1.296             | 2.835                                                 | 0.004 | 1.299             | 2.476                                                 | 0.005 | 1.306             | 1.721                                                 | 0.002 | 1.311             | 1.201                                                 | 0.001 |
| 1.637             | 2.711                                                 | 0.008 | 1.634             | 2.397                                                 | 0.006 | 1.651             | 1.686                                                 | 0.002 | 1.650             | 1.190                                                 | 0.001 |
| 1.655             | 2.770                                                 | 0.004 | 1.653             | 2.434                                                 | 0.003 | 1.670             | 1.703                                                 | 0.001 | 1.668             | 1.195                                                 | 0.000 |
| 1.674             | 2.798                                                 | 0.001 | 1.671             | 2.447                                                 | 0.001 | 1.688             | 1.716                                                 | 0.001 | 1.686             | 1.202                                                 | 0.001 |
| 1.692             | 2.831                                                 | 0.002 | 1.690             | 2.462                                                 | 0.002 | 2.468             | 1.808                                                 | 0.004 | 2.463             | 1.358                                                 | 0.008 |
| 1.711             | 2.876                                                 | 0.006 | 1.708             | 2.483                                                 | 0.004 | 2.481             | 1.854                                                 | 0.005 | 3.649             | 1.188                                                 | 0.002 |
| 2.515             | 3.298                                                 | 0.016 | 2.500             | 2.568                                                 | 0.006 | 3.663             | 1.698                                                 | 0.004 | 4.012             | 1.182                                                 | 0.002 |
| 2.536             | 2.951                                                 | 0.012 | 2.515             | 2.674                                                 | 0.007 | 4.019             | 1.689                                                 | 0.004 | 4.030             | 1.192                                                 | 0.001 |
| 3.686             | 6.901                                                 | 0.006 | 3.691             | 2.459                                                 | 0.004 | 4.037             | 1.706                                                 | 0.002 | 4.047             | 1.201                                                 | 0.002 |
| 3.710             | 3.438                                                 | 0.045 | 3.914             | 6.094                                                 | 0.006 | 4.055             | 1.728                                                 | 0.002 | 4.878             | 2.845                                                 | 0.012 |
| 4.050             | 2.796                                                 | 0.005 | 4.037             | 2.490                                                 | 0.006 | 4.454             | 4.180                                                 | 0.006 | 6.695             | 1.477                                                 | 0.002 |
| 4.068             | 2.816                                                 | 0.002 | 4.055             | 2.476                                                 | 0.003 | 6.669             | 2.082                                                 | 0.004 | 7.136             | 1.476                                                 | 0.001 |
| 4.086             | 2.870                                                 | 0.006 | 4.073             | 2.511                                                 | 0.005 | 7.103             | 2.074                                                 | 0.004 | 7.494             | 1.195                                                 | 0.001 |
| 6.642             | 3.449                                                 | 0.006 | 6.646             | 2.978                                                 | 0.005 | 7.494             | 1.713                                                 | 0.002 | 7.553             | 1.194                                                 | 0.001 |
| 7.075             | 3.548                                                 | 0.003 | 7.077             | 2.978                                                 | 0.005 | 7.548             | 1.712                                                 | 0.003 |                   |                                                       |       |
| 7.540             | 2.813                                                 | 0.007 | 7.518             | 2.465                                                 | 0.004 |                   |                                                       |       |                   |                                                       |       |
| 7.580             | 2.816                                                 | 0.009 | 7.563             | 2.488                                                 | 0.003 |                   |                                                       |       |                   |                                                       |       |

| [BMMIm][Im] 0.1 M + CO <sub>2</sub> |                                                       |       | [BMMIm][Im] 0.4 M + CO <sub>2</sub> |                                                       |       | [BMMI][Im] 1.0 M + CO <sub>2</sub> |                                                       |       | [BMMIm][Im] 2.0 M + CO <sub>2</sub> |                                                       |       |
|-------------------------------------|-------------------------------------------------------|-------|-------------------------------------|-------------------------------------------------------|-------|------------------------------------|-------------------------------------------------------|-------|-------------------------------------|-------------------------------------------------------|-------|
| Frequency (ppm)                     | D (10 <sup>-10</sup> m <sup>2</sup> s <sup>-1</sup> ) | Error | Frequency (ppm)                     | D (10 <sup>-10</sup> m <sup>2</sup> s <sup>-1</sup> ) | Error | Frequency (ppm)                    | D (10 <sup>-10</sup> m <sup>2</sup> s <sup>-1</sup> ) | Error | Frequency (ppm)                     | D (10 <sup>-10</sup> m <sup>2</sup> s <sup>-1</sup> ) | Error |
| 0.866                               | 2.634                                                 | 0.002 | 0.848                               | 2.151                                                 | 0.002 | 0.826                              | 1.360                                                 | 0.002 | 0.813                               | 1.166                                                 | 0.002 |
| 0.884                               | 2.663                                                 | 0.001 | 0.866                               | 2.172                                                 | 0.003 | 0.844                              | 1.390                                                 | 0.003 | 0.831                               | 1.190                                                 | 0.002 |
| 0.902                               | 2.689                                                 | 0.002 | 0.884                               | 2.195                                                 | 0.002 | 0.863                              | 1.407                                                 | 0.003 | 0.850                               | 1.203                                                 | 0.002 |
| 1.235                               | 2.618                                                 | 0.003 | 1.220                               | 2.145                                                 | 0.003 | 1.188                              | 1.279                                                 | 0.005 | 1.193                               | 1.158                                                 | 0.003 |
| 1.253                               | 2.645                                                 | 0.001 | 1.238                               | 2.160                                                 | 0.001 | 1.206                              | 1.353                                                 | 0.002 | 1.212                               | 1.173                                                 | 0.001 |
| 1.272                               | 2.660                                                 | 0.002 | 1.257                               | 2.180                                                 | 0.002 | 1.224                              | 1.379                                                 | 0.001 | 1.230                               | 1.186                                                 | 0.001 |
| 1.291                               | 2.663                                                 | 0.002 | 1.276                               | 2.186                                                 | 0.003 | 1.243                              | 1.392                                                 | 0.001 | 1.249                               | 1.201                                                 | 0.002 |
| 1.653                               | 2.644                                                 | 0.002 | 1.622                               | 2.122                                                 | 0.005 | 1.262                              | 1.402                                                 | 0.002 | 1.613                               | 1.165                                                 | 0.002 |
| 1.672                               | 2.660                                                 | 0.002 | 1.641                               | 2.155                                                 | 0.003 | 1.280                              | 1.399                                                 | 0.006 | 1.632                               | 1.183                                                 | 0.001 |
| 1.691                               | 2.677                                                 | 0.002 | 1.660                               | 2.177                                                 | 0.001 | 1.609                              | 1.322                                                 | 0.004 | 1.650                               | 1.198                                                 | 0.001 |
| 2.514                               | 3.334                                                 | 0.022 | 1.678                               | 2.193                                                 | 0.002 | 1.627                              | 1.371                                                 | 0.001 | 2.532                               | 1.177                                                 | 0.002 |
| 2.530                               | 2.671                                                 | 0.013 | 1.697                               | 2.209                                                 | 0.006 | 1.646                              | 1.395                                                 | 0.001 | 2.548                               | 1.207                                                 | 0.001 |
| 2.549                               | 2.734                                                 | 0.011 | 2.527                               | 2.190                                                 | 0.002 | 1.664                              | 1.413                                                 | 0.001 | 3.739                               | 1.197                                                 | 0.002 |
| 3.726                               | 2.903                                                 | 0.013 | 2.542                               | 2.203                                                 | 0.002 | 1.682                              | 1.428                                                 | 0.004 | 4.047                               | 1.165                                                 | 0.002 |
| 3.802                               | 6.628                                                 | 0.004 | 3.724                               | 2.187                                                 | 0.002 | 2.541                              | 1.380                                                 | 0.003 | 4.065                               | 1.188                                                 | 0.001 |
| 4.059                               | 2.780                                                 | 0.012 | 4.050                               | 2.246                                                 | 0.005 | 2.556                              | 1.415                                                 | 0.002 | 4.083                               | 1.207                                                 | 0.002 |
| 4.076                               | 2.739                                                 | 0.006 | 4.068                               | 2.235                                                 | 0.004 | 3.742                              | 1.403                                                 | 0.002 | 6.996                               | 1.792                                                 | 0.003 |
| 4.095                               | 2.814                                                 | 0.010 | 4.086                               | 2.314                                                 | 0.011 | 4.060                              | 1.372                                                 | 0.004 | 7.624                               | 1.195                                                 | 0.002 |

|                                  |                   |       |                   |       |       |                   |       |       |                   |       |       |
|----------------------------------|-------------------|-------|-------------------|-------|-------|-------------------|-------|-------|-------------------|-------|-------|
| 7.003                            | 4.258             | 0.003 | 4.283             | 5.644 | 0.006 | 4.078             | 1.398 | 0.002 | 7.651             | 1.578 | 0.004 |
| 7.568                            | 2.682             | 0.004 | 6.992             | 3.361 | 0.006 | 4.096             | 1.417 | 0.002 |                   |       |       |
| 7.598                            | 2.697             | 0.007 | 7.565             | 2.189 | 0.003 | 6.979             | 2.078 | 0.002 |                   |       |       |
| 7.639                            | 4.256             | 0.005 | 7.590             | 2.195 | 0.004 | 7.626             | 1.698 | 0.004 |                   |       |       |
|                                  |                   |       | 7.632             | 3.324 | 0.009 | 7.645             | 1.444 | 0.003 |                   |       |       |
| Cation<br>mean<br>value $\pm$ SD | 2.686 $\pm$ 0.072 |       | 2.190 $\pm$ 0.041 |       |       | 1.386 $\pm$ 0.038 |       |       | 1.186 $\pm$ 0.016 |       |       |
| Anion<br>mean<br>value $\pm$ SD  | 4.257 $\pm$ 0.002 |       | 3.343 $\pm$ 0.026 |       |       | 2.078             |       |       | 1.792             |       |       |

**Table S7.** Diffusion coefficients (D) measured for each signal (frequency) of the  $^1\text{H}$ -DOSY spectra of IL [BMMIm][2-MeIm] at different concentrations before and after  $\text{CO}_2$  bubbling. The colors indicate the signals from: cation in orange, anion in purple, residual solvent in green, water in blue and peaks unrelated to sample in gray.

| [BMMIm][2-MeIm] 0.1 M |                                             |       | [BMMIm][2-MeIm] 0.4 M |                                             |       | [BMMIm][2-MeIm] 1.0 M |                                             |       | [BMMIm][2-MeIm] 2.0 M |                                             |       |
|-----------------------|---------------------------------------------|-------|-----------------------|---------------------------------------------|-------|-----------------------|---------------------------------------------|-------|-----------------------|---------------------------------------------|-------|
| Frequency (ppm)       | D ( $10^{-10} \text{ m}^2 \text{ s}^{-1}$ ) | Error | Frequency (ppm)       | D ( $10^{-10} \text{ m}^2 \text{ s}^{-1}$ ) | Error | Frequency (ppm)       | D ( $10^{-10} \text{ m}^2 \text{ s}^{-1}$ ) | Error | Frequency (ppm)       | D ( $10^{-10} \text{ m}^2 \text{ s}^{-1}$ ) | Error |
| 0.869                 | 2.873                                       | 0.007 | 0.865                 | 2.522                                       | 0.002 | 0.850                 | 1.704                                       | 0.002 | 0.843                 | 0.843                                       | 0.002 |
| 0.888                 | 2.925                                       | 0.009 | 0.883                 | 2.529                                       | 0.002 | 0.869                 | 1.718                                       | 0.003 | 0.861                 | 0.853                                       | 0.001 |
| 0.907                 | 2.927                                       | 0.011 | 0.901                 | 2.561                                       | 0.008 | 0.886                 | 1.720                                       | 0.006 | 0.879                 | 0.857                                       | 0.002 |
| 1.219                 | 2.807                                       | 0.011 | 1.233                 | 2.526                                       | 0.003 | 1.223                 | 1.704                                       | 0.003 | 1.222                 | 0.845                                       | 0.002 |
| 1.237                 | 2.884                                       | 0.004 | 1.252                 | 2.533                                       | 0.002 | 1.241                 | 1.713                                       | 0.002 | 1.239                 | 0.849                                       | 0.001 |
| 1.255                 | 2.897                                       | 0.002 | 1.270                 | 2.538                                       | 0.002 | 1.260                 | 1.725                                       | 0.002 | 1.259                 | 0.854                                       | 0.001 |
| 1.275                 | 2.918                                       | 0.002 | 1.290                 | 2.560                                       | 0.005 | 1.279                 | 1.730                                       | 0.002 | 1.277                 | 0.857                                       | 0.002 |
| 1.293                 | 2.922                                       | 0.004 | 1.645                 | 2.532                                       | 0.004 | 1.631                 | 1.716                                       | 0.001 | 1.626                 | 0.849                                       | 0.002 |
| 1.312                 | 2.944                                       | 0.013 | 1.664                 | 2.538                                       | 0.001 | 1.650                 | 1.719                                       | 0.001 | 1.644                 | 0.854                                       | 0.001 |
| 1.633                 | 2.850                                       | 0.005 | 1.683                 | 2.548                                       | 0.002 | 1.668                 | 1.724                                       | 0.003 | 1.662                 | 0.857                                       | 0.001 |



|                        |               |       |       |               |       |       |               |       |       |               |       |
|------------------------|---------------|-------|-------|---------------|-------|-------|---------------|-------|-------|---------------|-------|
| 0.902                  | 2.957         | 0.009 | 0.900 | 2.473         | 0.002 | 0.874 | 1.585         | 0.004 | 0.842 | 0.750         | 0.002 |
| 1.234                  | 2.892         | 0.003 | 1.219 | 2.383         | 0.006 | 1.203 | 1.528         | 0.006 | 1.200 | 0.747         | 0.001 |
| 1.253                  | 2.907         | 0.002 | 1.236 | 2.439         | 0.004 | 1.220 | 1.571         | 0.003 | 1.219 | 0.755         | 0.001 |
| 1.271                  | 2.917         | 0.001 | 1.255 | 2.450         | 0.001 | 1.239 | 1.585         | 0.001 | 1.237 | 0.757         | 0.001 |
| 1.291                  | 2.924         | 0.004 | 1.274 | 2.442         | 0.003 | 1.257 | 1.586         | 0.001 | 1.257 | 0.754         | 0.002 |
| 1.633                  | 2.831         | 0.007 | 1.293 | 2.428         | 0.003 | 1.276 | 1.568         | 0.004 | 1.602 | 0.750         | 0.003 |
| 1.651                  | 2.847         | 0.002 | 1.311 | 2.321         | 0.009 | 1.295 | 1.506         | 0.013 | 1.621 | 0.757         | 0.001 |
| 1.670                  | 2.917         | 0.002 | 1.635 | 2.381         | 0.004 | 1.621 | 1.550         | 0.006 | 1.639 | 0.761         | 0.000 |
| 1.688                  | 2.929         | 0.002 | 1.653 | 2.429         | 0.001 | 1.639 | 1.577         | 0.002 | 1.658 | 0.763         | 0.001 |
| 1.706                  | 2.903         | 0.006 | 1.672 | 2.436         | 0.001 | 1.657 | 1.586         | 0.001 | 1.676 | 0.751         | 0.003 |
| 2.239                  | 4.168         | 0.006 | 1.691 | 2.436         | 0.002 | 1.676 | 1.579         | 0.002 | 2.255 | 1.025         | 0.001 |
| 2.501                  | 4.942         | 0.019 | 1.709 | 2.425         | 0.006 | 1.694 | 1.540         | 0.005 | 2.508 | 1.819         | 0.005 |
| 2.524                  | 2.951         | 0.010 | 2.246 | 3.389         | 0.005 | 2.246 | 2.109         | 0.001 | 2.542 | 1.612         | 0.020 |
| 2.531                  | 2.952         | 0.003 | 2.508 | 4.893         | 0.013 | 2.508 | 3.442         | 0.005 | 2.587 | 0.767         | 0.001 |
| 3.729                  | 3.235         | 0.022 | 3.746 | 2.473         | 0.004 | 2.549 | 1.763         | 0.009 | 2.603 | 0.776         | 0.002 |
| 4.064                  | 2.957         | 0.004 | 3.879 | 1.451         | 0.008 | 2.558 | 1.686         | 0.007 | 3.790 | 0.762         | 0.001 |
| 4.082                  | 2.966         | 0.003 | 4.079 | 2.480         | 0.002 | 3.763 | 1.601         | 0.002 | 4.105 | 0.755         | 0.002 |
| 4.101                  | 3.005         | 0.006 | 4.097 | 2.484         | 0.001 | 4.088 | 1.580         | 0.003 | 4.123 | 0.762         | 0.000 |
| 6.811                  | 4.168         | 0.006 | 4.115 | 2.523         | 0.004 | 4.106 | 1.591         | 0.002 | 4.141 | 0.768         | 0.001 |
| 7.589                  | 2.932         | 0.004 | 6.807 | 3.394         | 0.005 | 4.125 | 1.602         | 0.004 | 6.788 | 1.026         | 0.001 |
| 7.618                  | 2.946         | 0.003 | 7.627 | 2.470         | 0.004 | 6.790 | 2.110         | 0.004 | 7.750 | 0.760         | 0.001 |
|                        |               |       | 7.651 | 2.480         | 0.002 | 7.678 | 1.591         | 0.002 | 7.771 | 0.763         | 0.001 |
|                        |               |       |       |               |       | 7.699 | 1.601         | 0.002 |       |               |       |
| Cation mean value ± SD | 2.923 ± 0.043 |       |       | 2.441 ± 0.044 |       |       | 1.573 ± 0.025 |       |       | 0.756 ± 0.006 |       |
| Anion mean value ± SD  | 4.168         |       |       | 3.391 ± 0.004 |       |       | 2.109 ± 0.001 |       |       | 1.025 ± 0.001 |       |

**Table S8.** Diffusion coefficients (D) measured for each signal (frequency) of the <sup>13</sup>C-DOSY spectra of mixtures of ILs [BMMIm][Im] and [BMMIm][2-MeIm], at different concentrations, with CO<sub>2</sub>. The colors indicate the signals from: cation in orange, anions [Im]<sup>-</sup> and [2-MeIm]<sup>-</sup> in purple, residual solvent in green, peaks unrelated to sample in gray and anion HCO<sub>3</sub><sup>-</sup> in yellow.

| [BMMIm][Im] 1.0 M + CO <sub>2</sub> |                                                       |       | [BMMIm][Im] 2.0 M + CO <sub>2</sub> |                                                       |       | [BMMIm][2-MeIm] 1.0 M + CO <sub>2</sub> |                                                       |       | [BMMIm][2-MeIm] 2.0 M + CO <sub>2</sub> |                                                       |       |
|-------------------------------------|-------------------------------------------------------|-------|-------------------------------------|-------------------------------------------------------|-------|-----------------------------------------|-------------------------------------------------------|-------|-----------------------------------------|-------------------------------------------------------|-------|
| Frequency (ppm)                     | D (10 <sup>-10</sup> m <sup>2</sup> s <sup>-1</sup> ) | Error | Frequency (ppm)                     | D (10 <sup>-10</sup> m <sup>2</sup> s <sup>-1</sup> ) | Error | Frequency (ppm)                         | D (10 <sup>-10</sup> m <sup>2</sup> s <sup>-1</sup> ) | Error | Frequency (ppm)                         | D (10 <sup>-10</sup> m <sup>2</sup> s <sup>-1</sup> ) | Error |
| 8.998                               | 1.415                                                 | 0.060 | 8.949                               | 1.233                                                 | 0.033 | 8.839                                   | 1.900                                                 | 0.134 | 8.803                                   | 1.150                                                 | 0.124 |
| 9.194                               | 1.428                                                 | 0.049 | 9.157                               | 1.183                                                 | 0.059 | 9.047                                   | 1.871                                                 | 0.130 | 8.999                                   | 1.266                                                 | 0.096 |
| 9.402                               | 1.329                                                 | 0.024 | 9.353                               | 1.103                                                 | 0.033 | 9.242                                   | 1.664                                                 | 0.059 | 9.195                                   | 1.193                                                 | 0.016 |
| 13.768                              | 1.353                                                 | 0.012 | 13.719                              | 1.210                                                 | 0.007 | 13.596                                  | 1.675                                                 | 0.033 | 13.561                                  | 1.239                                                 | 0.009 |
| 19.296                              | 1.383                                                 | 0.014 | 19.296                              | 1.179                                                 | 0.017 | 13.706                                  | 2.039                                                 | 0.024 | 13.671                                  | 1.441                                                 | 0.008 |
| 31.588                              | 1.387                                                 | 0.020 | 31.563                              | 1.223                                                 | 0.020 | 19.112                                  | 1.700                                                 | 0.035 | 19.138                                  | 1.205                                                 | 0.021 |
| 34.963                              | 1.354                                                 | 0.016 | 34.926                              | 1.189                                                 | 0.013 | 31.416                                  | 1.743                                                 | 0.035 | 31.430                                  | 1.200                                                 | 0.036 |
| 39.048                              | 2.923                                                 | 0.027 | 39.048                              | 2.638                                                 | 0.026 | 34.804                                  | 1.646                                                 | 0.040 | 34.768                                  | 1.208                                                 | 0.025 |
| 39.256                              | 2.937                                                 | 0.017 | 39.256                              | 2.646                                                 | 0.009 | 38.901                                  | 3.404                                                 | 0.074 | 38.890                                  | 2.657                                                 | 0.082 |
| 39.464                              | 2.937                                                 | 0.005 | 39.464                              | 2.623                                                 | 0.010 | 39.109                                  | 3.484                                                 | 0.025 | 39.098                                  | 2.619                                                 | 0.018 |
| 39.672                              | 2.945                                                 | 0.004 | 39.672                              | 2.608                                                 | 0.008 | 39.317                                  | 3.501                                                 | 0.010 | 39.306                                  | 2.626                                                 | 0.014 |
| 39.880                              | 2.954                                                 | 0.006 | 39.880                              | 2.602                                                 | 0.008 | 39.525                                  | 3.538                                                 | 0.011 | 39.514                                  | 2.617                                                 | 0.011 |
| 40.088                              | 2.950                                                 | 0.018 | 40.088                              | 2.593                                                 | 0.011 | 39.733                                  | 3.497                                                 | 0.011 | 39.722                                  | 2.618                                                 | 0.014 |
| 40.296                              | 2.888                                                 | 0.045 | 40.296                              | 2.645                                                 | 0.037 | 39.941                                  | 3.501                                                 | 0.031 | 39.930                                  | 2.654                                                 | 0.018 |
| 47.744                              | 1.376                                                 | 0.024 | 47.744                              | 1.180                                                 | 0.021 | 40.149                                  | 3.463                                                 | 0.083 | 40.138                                  | 2.632                                                 | 0.061 |
| 121.174                             | 1.445                                                 | 0.095 | 121.284                             | 1.190                                                 | 0.015 | 47.548                                  | 1.654                                                 | 0.061 | 47.586                                  | 1.148                                                 | 0.058 |
| 121.309                             | 1.366                                                 | 0.020 | 122.104                             | 2.275                                                 | 0.051 | 121.016                                 | 1.881                                                 | 0.098 | 121.151                                 | 1.271                                                 | 0.033 |
| 122.079                             | 2.311                                                 | 0.039 | 122.715                             | 1.250                                                 | 0.016 | 121.150                                 | 1.672                                                 | 0.061 | 121.335                                 | 1.462                                                 | 0.014 |
| 122.617                             | 1.465                                                 | 0.083 | 135.851                             | 1.853                                                 | 0.017 | 121.297                                 | 2.259                                                 | 0.073 | 122.460                                 | 1.321                                                 | 0.087 |
| 122.752                             | 1.404                                                 | 0.019 | 144.400                             | 1.176                                                 | 0.011 | 122.459                                 | 1.438                                                 | 0.178 | 122.570                                 | 1.205                                                 | 0.035 |
| 135.851                             | 2.032                                                 | 0.011 | 160.372                             | 1.038                                                 | 0.005 | 122.581                                 | 1.617                                                 | 0.093 | 144.169                                 | 1.418                                                 | 0.006 |
| 144.436                             | 1.364                                                 | 0.017 |                                     |                                                       |       | 144.058                                 | 2.046                                                 | 0.025 | 160.166                                 | 1.224                                                 | 0.018 |
| 160.115                             | 1.285                                                 | 0.025 |                                     |                                                       |       | 144.278                                 | 1.660                                                 | 0.035 |                                         |                                                       |       |
|                                     |                                                       |       |                                     |                                                       |       | 159.676                                 | 1.587                                                 | 0.151 |                                         |                                                       |       |

|                                     |                   |                   |                   |                   |
|-------------------------------------|-------------------|-------------------|-------------------|-------------------|
| Cation mean value $\pm$ SD          | $1.378 \pm 0.029$ | $1.192 \pm 0.346$ | $1.67 \pm 0.04$   | $1.217 \pm 0.028$ |
| Anion mean value $\pm$ SD           | $2.171 \pm 0.197$ | $2.064 \pm 0.298$ | $2.042 \pm 0.005$ | $1.440 \pm 0.022$ |
| HCO <sub>3</sub> <sup>-</sup> value | 1.285             | 1.038             | 1.587             | 1.224             |
